# Supplementary material for: Psychosocial work characteristics, burnout, psychological morbidity symptoms and early retirement intentions: a cross-sectional study of NHS consultants in the UK
Source: PubMed Central journal article supplement — BMJ Open. 2018 Jul 23;8(7):e018720. doi: 10.1136/bmjopen-2017-018720 (PMC6059335; doi:10.1136/bmjopen-2017-018720), 2018-07-23
Supplement: bmjopen-2017-018720.draft_revisions.pdf [file bmjopen-2017-018720.draft_revisions.pdf]

# BMJ Open

BMJ Open is committed to open peer review. As part of this commitment we make the peer review history of every article we publish publicly available.

When an article is published we post the peer reviewers' comments and the authors' responses online. We also post the versions of the paper that were used during peer review. These are the versions that the peer review comments apply to.

The versions of the paper that follow are the versions that were submitted during the peer review process. They are not the versions of record or the final published versions. They should not be cited or distributed as the published version of this manuscript.

BMJ Open is an open access journal and the full, final, typeset and author-corrected version of record of the manuscript is available on our site with no access controls, subscription charges or pay-per-view fees (<http://bmjopen.bmj.com>).

If you have any questions on BMJ Open's open peer review process please email [info.bmjopen@bmj.com](mailto:info.bmjopen@bmj.com)

# BMJ Open

## **Job Autonomy and Burnout as Correlates of Psychological Morbidity and Work-related Stress: A Cross-sectional Study of NHS Consultants.**

|                               |                                                                                                                                                                                                                                                 |
|-------------------------------|-------------------------------------------------------------------------------------------------------------------------------------------------------------------------------------------------------------------------------------------------|
| Journal:                      | <i>BMJ Open</i>                                                                                                                                                                                                                                 |
| Manuscript ID                 | bmjopen-2017-018720                                                                                                                                                                                                                             |
| Article Type:                 | Research                                                                                                                                                                                                                                        |
| Date Submitted by the Author: | 02-Sep-2017                                                                                                                                                                                                                                     |
| Complete List of Authors:     | Khan, Atir; Medicine<br>Islam, Saiful; Swansea University, College of Medicine<br>Teoh, Kevin; Birkbeck University of London, Department of Organizational Psychology<br>Hassard, Juliet; Nottingham Trent University, Department of Psychology |
| Keywords:                     | Stress, Psychological Morbidity, Burn-out, Autonomy                                                                                                                                                                                             |
|                               |                                                                                                                                                                                                                                                 |

SCHOLARONE™  
Manuscripts

Peer Review Only

# Job Autonomy and Burnout as Correlates of Psychological Morbidity and Work-related Stress: A Cross-sectional Study of NHS Consultants.

Atir Khan<sup>1</sup>, Saiful Islam<sup>2</sup>, Kevin Teoh<sup>3</sup>, Juliet Hassard<sup>4</sup>.

<sup>1</sup>Consultant Physician Diabetes & Endocrinology, Diabetes Centre, Glangwili Hospital, Hywel Dda University Health Board, Carmarthen, SA31 2AF, U.K.

<sup>2</sup>Statistician, Swansea Trials Unit, College of Medicine, Swansea University, Swansea, SA2 8PP, U.K.

<sup>3</sup>Lecturer, Department of Organizational Psychology, Birkbeck University of London, London, WC1E 7HX, U.K.

<sup>4</sup>Senior Lecturer in Occupational Health Psychology, Department of Psychology, Nottingham Trent University, Nottingham, NG1 4FQ, U.K.

## Corresponding Author

Dr Atir Sultan Ali Khan, Diabetes Centre, Glangwili Hospital, Hywel Dda University Health Board, Carmarthen, SA31 2AF, U.K.

[atir.khan45@gmail.com](mailto:atir.khan45@gmail.com)

Tel: +44-1267-227-869

## Data Sharing Statement

Some data from this study will be used for publication in a second paper. The data evaluates early retirement due to stress and lack of autonomy in NHS consultants. The data is secured with Dr M. Islam (statistician).

**Licence To Publish Statement** “I, Dr Atir Sultan Ali Khan, the Corresponding Author of this article contained within the original manuscript which includes any diagrams & photographs within and any related or stand-alone film submitted (the Contribution”) has the right to grant on behalf of all authors and does grant on behalf of all authors, a licence to the BMJ Publishing Group Ltd and its licensees, to permit this Contribution (if accepted) to be published in the BMJ and any other BMJ Group products and to exploit all subsidiary rights, as set out in our licence set out at: <http://www.bmj.com/about-bmj/resources-authors/forms-policies-and-checklists/copyright-open-access-and-permission-reuse>.”

**Transparency Declaration** Lead author (Dr Atir Khan) affirms that the manuscript is an honest, accurate, and transparent account of the study being reported; that no important aspects of the study have been omitted; and that any discrepancies from the study as planned (and, if relevant, registered) have been explained.

## Abstract

**OBJECTIVES** This study aims first to examine the associations between job autonomy and burnout in relation to self-reported work-related stress and depression and anxiety symptoms; and then, to examine the current level of psychological morbidity among a sample of hospital consultants in the NHS.

**DESIGN and SETTING** A cross-sectional observational study in U.K. NHS hospitals.

**PARTICIPANTS** 593 NHS consultants (Male = 63.1%) from hospitals in England, Scotland and Wales.

**PRIMARY OUTCOME MEASURES** Self-reported online questionnaires on job autonomy (Job Demands-Resources Questionnaire), burnout (Maslach Burnout Inventory), depressive and anxiety symptoms (State Trait Personality Inventory), and work-related stress (Occupational Stress Indicator).

**RESULTS** Lack of job autonomy was a significant predictor of work-related stress ( $B=-2.61$ , 95% CI  $-2.99$  to  $-2.22$ ,  $p < .001$ ), depressive ( $B=-0.28$ , 95% CI  $-0.41$  to  $-0.16$ ,  $p < .001$ ) and anxiety symptoms ( $B=0.16$ , 95% CI  $-0.27$  to  $-0.04$ ,  $p < .01$ ). Burnout was observed to associate, with self-reported work-related stress ( $B=0.44$ , 95% CI  $0.37$  to  $0.92$ ,  $p < .001$ ), and depressive ( $B=0.20$ , 95% CI  $0.18$  to  $0.23$ ,  $p < .001$ ) and anxiety symptoms ( $B=0.18$ , 95% CI  $0.16$  to  $0.19$ ,  $p < .001$ ). Results of this study observe high prevalence rates across all adverse health measures within this sample, namely: emotional exhaustion (38.7%), depersonalisation (13%), work-related stress (74.5%), anxiety symptoms (43.1%), and depressive symptoms (36.1%).

**CONCLUSIONS** This is the first study to observe low job autonomy and burnout to associate with psychological morbidity and work-related stress in a sample of NHS consultants. This study contributes to the building evidence, demonstrating the worryingly high occurrence of mental health issues and strain experienced by consultants working in the NHS. The findings highlight two potential avenues for targeted workplace intervention: improving consultants' job autonomy, and providing support and resources to prevent burnout. This study has implications for NHS policy makers and senior leadership.

## STRENGTHS OF THIS STUDY

- This is the first study to contribute to the existing literature by demonstrating a link between lack of job autonomy and burnout on work-related stress, depressive symptoms, and anxiety symptoms among NHS consultants in England, Wales and Scotland.
- The study also provides a contemporary update on the current levels of burnout, work-related stress, anxiety symptoms and depressive symptoms in a sample of NHS consultants.
- Results of this study provide a basis to inform future organizational research in the NHS. Further studies will help to develop a picture of ‘the psychosocial working environment’ of today’s NHS.
- The issues (e.g., “lack of job autonomy” and “burnout” in this study), identified from empirical data, should become targets of intervention and improvement measures.
- These findings could inform the discussions and decisions being made by NHS policy and decision makers. We expect that similar empirical studies in future will help to improve the NHS in future.

## LIMITATIONS OF THIS STUDY

- This is a cross-sectional study design.
- As such, any interpretation of causality is not appropriate, as it is plausible that the relationship between job autonomy, burnout, depressive and anxiety symptoms, and work-related stress may be reciprocal in nature.
- All study variables were drawn from self-report data of the individual consultant, making it vulnerable to common method bias.
- Care needs to be taken in generalizing any findings to the wider profession or sector.

## Introduction

In United Kingdom, 27% to 32% of NHS consultants have been reported to have high levels of psychiatric morbidity and burnout<sup>1,2</sup>. More recent reviews have reported similar depression<sup>3</sup> and burnout<sup>4</sup> rates among doctors in general. Doctor's mental health has been linked with patient safety<sup>5</sup> and turnover intentions<sup>6</sup>, making it imperative to study the antecedents of psychological morbidities. Such knowledge can inform the development of targeted evidence-based workplace interventions. Research in this area has remained predominately focused on demanding aspects (e.g., working hours, perceived workload) of the working environment as predictors of doctors' psychological morbidity<sup>5,7</sup>. We aim to extend this literature by testing the role of job autonomy and burnout as antecedents of work-related stress, depression and anxiety.

Qualitative research has observed that NHS consultants feel an erosion of their work-related autonomy, particularly in relation to the organisation and management of their work<sup>10</sup>. This is concerning because job autonomy is the cornerstone of several work motivational<sup>11,12</sup> and occupational stress theories<sup>16</sup>. Job autonomy provides workers with the discretion, independence, and freedom to make decisions, to arrange tasks, and to select the best methods and procedures at work<sup>11</sup>. Such skill discretion makes work meaningful, and provides flexibility to select and pursue important work goals<sup>13</sup>. Empirical evidence supports these theoretical assumptions, with meta-analyses observing high job autonomy to predict job satisfaction, intrinsic motivation, growth satisfaction, organizational commitment, decreased turnover intention, and enhanced job performance<sup>13,14</sup>. Conversely, within the general working population, evidence indicates low job autonomy to significantly predict psychological morbidity<sup>8,15</sup> and stress-related disorders<sup>17</sup>. We are not aware, however, of any attempts to test the relationships between job autonomy and

1  
2  
3 psychological morbidity amongst the NHS consultants. This clear gap in knowledge will be  
4  
5 addressed by the current study.  
6  
7

8  
9 Much of the research in psychological morbidity has examined how it is predicted by  
10  
11 intra-individual factors<sup>5</sup> (personality and demographics). More recently, burnout has been  
12  
13 postulated to operate as an antecedent to more serious mental health conditions (e.g., depression  
14  
15 and anxiety)<sup>9</sup>. Burnout is defined as a syndrome of three dimensions<sup>22</sup>: emotional exhaustion,  
16  
17 depersonalisation, and reduced personal accomplishment. Emotional exhaustion denotes being  
18  
19 emotionally overextended and exhausted by work; depersonalisation refers to an impersonal  
20  
21 feeling towards people; and reduced personal accomplishment encompasses the reduced work  
22  
23 effectiveness due to emotional exhaustion and depersonalisation. Understanding this relationship  
24  
25 is crucial due to the reported high prevalence rates of burnout amongst the doctors<sup>3,4</sup>, which  
26  
27 appear to be increasing<sup>2,18</sup>. Although, burnout and work-related stress have been previously  
28  
29 observed to frequently occur among UK doctors<sup>19</sup>; previous research has not, however, examined  
30  
31 the association between burnout and self-reported depression and anxiety symptoms within this  
32  
33 working population. Such information would yield greater understanding of the psychosocial  
34  
35 factors linked with the psychological morbidity in UK consultants.  
36  
37  
38  
39  
40

#### 41 *Aims and Hypotheses*

42  
43  
44 The aims of the study were twofold. Firstly, to examine the associations between job  
45  
46 autonomy and burnout in relation to self-reported work-related stress and depression and anxiety  
47  
48 symptoms; and, secondly, to examine the current level of psychological morbidity among a  
49  
50 sample of hospital consultants in the NHS. The study hypothesizes that: (i) low job autonomy  
51  
52 will negatively predict consultants' self-reported work-related stress, depressive and anxiety  
53  
54  
55  
56  
57  
58  
59  
60

1  
2  
3 symptoms; and (ii) burnout will positively predict consultants' self-reported work-related stress,  
4  
5 depressive and anxiety symptoms.  
6  
7

## 8 9 **Methods**

### 10 11 *Study design, setting and population*

12  
13  
14 A cross-sectional quantitative survey was carried out between November and December  
15  
16 2015. A simple random sample of 500 was calculated allowing 5% absolute error in the work  
17  
18 related stress (one main outcome measure) and considering it as a standard normal variate. This  
19  
20 also corresponds with the existing literature in similar areas (e.g., Agius et al.<sup>20</sup>). Questionnaires  
21  
22 were sent to the consultants through human resource departments of relevant Trusts and Health  
23  
24 Boards of all the three countries: England, Wales and Scotland. The invited consultants took part  
25  
26 in the survey, conducted by an electronic survey tool, Bristol on-line<sup>i</sup>. To minimize the  
27  
28 respondent bias, the research team (including the principle investigator) were blind about the  
29  
30 responding consultants and vice versa. The study received ethical approval from Birkbeck  
31  
32 University of London.  
33  
34  
35  
36  
37

38 In total, 593 responses were completed online. A full demographical breakdown is  
39  
40 presented in Table 1. The sample was evenly split between England (32.5%), Wales (32%) and  
41  
42 Scotland (35.4%). The majority of respondents were male (63.1%), and aged between 41-50  
43  
44 years (45.5%) and 51-60 years (31%). In total, eight speciality groups were represented, with the  
45  
46 majority of respondents identifying as physicians (28.8%), surgeons (18.2%), anaesthesiologists  
47  
48 (14%) and others' (15.7%).  
49  
50

51  
52 <sup>i</sup> [www.survey.bris.ac.uk](http://www.survey.bris.ac.uk)  
53  
54  
55  
56  
57  
58  
59  
60



## Measures

Surveyed consultants provided information on socio-demographic details, job autonomy, burnout, work-related stress, and anxiety and depressive symptoms. Internal reliability statistics are reported in Table 2.

- Job autonomy was measured using three items from the Job Demands-Resources Questionnaire<sup>21</sup>. These (e.g., “do you have flexibility in the execution of your job?”) were rated on a five-point Likert scale, with high scores representing more autonomy.
- The Maslach Burnout Inventory<sup>22</sup> measured burnout. Although burnout contains three dimensions, only fourteen items from the first two dimensions of burnout (emotional exhaustion & depersonalisation) were used in this study. This is in line with previous research, advocating these as the core dimensions of burnout and the most effective way of scoring burnout<sup>4</sup>. These included items such as “I feel frustrated by my job” rated on a seven-point Likert scale, with high scores indicative of high burn-out. Emotional exhaustion refers to feeling emotionally overextended and exhausted by work, while depersonalisation denotes an impersonal feeling towards people. In line with the manual guidelines and past research<sup>1,2</sup>, cut-off scores from norm scores of health professionals were used to identify the proportion of consultants who scored highly on the two burnout dimensions. Aggregated scores of both dimensions were used for hypotheses testing.
- Depressive and anxiety symptoms were measured by the State Trait Personality Inventory<sup>23</sup>. The frequency of each item (e.g., “I feel depressed”) was rated on a four-point Likert scale with high scores representing greater experience of anxiety and depressive symptoms. Although neither measure has clinically diagnostic cut-off points,

1  
2  
3 consultants in this study with scores higher than the 75<sup>th</sup> percentile of UK working norm  
4 scores were classed as high scoring.  
5  
6

- 7  
8  
9 • The 22-items from the Occupational Stress Indicator<sup>25</sup> measured work-related stress.  
10 Respondents rated how satisfied they were with the items provided (e.g., “the level of job  
11 security in your present job”) on a six-point scale, with high scores representing more  
12 work-related stress. Consultants with who scored above the 75<sup>th</sup> percentile against the UK  
13 working norm were classed as experiencing high stress.  
14  
15  
16  
17  
18  
19

### 20 21 *Statistical analysis*

22  
23 Exploratory data analysis of demographic characteristics of consultants and constructs  
24 measured was performed. We used non-parametric Spearman's rank correlation to explore the  
25 relationship between individual measures. We checked the reliability of all measurement scales  
26 comprising multiple Likert questions by assessing internal consistency through Cronbach's alpha.  
27 Three Multiple Linear Regression Models (MLR1, MLR2 & MLR3) estimated the effect of job  
28 autonomy and burnout onto work-related stress, anxiety and depressive symptoms. All these  
29 were adjusted by socio-demographic characteristics of the consultants. Assumptions underlying  
30 multiple regressions were checked by plotting residual errors and standardised residuals.  
31 Existence of multicollinearity was checked through variance inflation factors, and Durbin-  
32 Watson tests were conducted for correlated residuals. All these diagnostics fell within the  
33 acceptable ranges for each multiple linear regression model. SPSS (version 22) was used for data  
34 management and statistical analysis. Missing data was examined; with, in general, low levels  
35 observed (i.e., 1.9% in gender and 0.7% for consultant specialty). Such data was excluded from  
36 the analysis due their non-significant size. The paper is reported in accordance with the STROBE  
37 statement<sup>24</sup>.  
38  
39  
40  
41  
42  
43  
44  
45  
46  
47  
48  
49  
50  
51  
52  
53  
54  
55  
56  
57  
58  
59  
60

## Results

### *Psychological morbidity*

Table 1 displays the characteristics of the participating consultants and indicates that 38.7% of consultants were classed as emotionally exhausted, while 13% had high depersonalisation. For work-related stress, 74.5% of consultants experienced high stress, while 43.1% and 36.1% of consultants reported anxiety and depressive symptoms respectively.

Table 1 also presents the prevalence of psychological morbidity across different demographics within this given sample. A higher percentage of male consultants experienced high depersonalisation and depression, whereas female consultants experienced a higher percentage of depersonalisation, anxiety and work-related stress. Across the three countries psychological morbidity was similar. Although Wales had more consultants experiencing emotional exhaustion, but had the fewest proportion of consultants with high levels of anxiety. Consultants aged 31-40 and 51-60 years had the poorest reported mental wellbeing, while those over the age of 60 had the best. In terms of specialty, pathology/ microbiology stands out with the highest prevalence on three of the five adverse health measures: emotional exhaustion, anxiety and depression.

**Table 1: Characteristics of participating consultants**

| Characteristics        | N (%) <sup>a</sup> | Burnout Dimensions   |                   |                     |                  |                     |
|------------------------|--------------------|----------------------|-------------------|---------------------|------------------|---------------------|
|                        |                    | Emotional Exhaustion | Depersonalisation | Work-related stress | Anxiety symptoms | Depressive symptoms |
| Study cohort:          |                    |                      |                   |                     |                  |                     |
| Substantive consultant | 593 (100 %)        | 38·70%               | 13·00%            | 74·50%              | 43·10%           | 36·10%              |
| Countries:             |                    |                      |                   |                     |                  |                     |
| England                | 193 (32·5%)        | 37·82%               | 12·95%            | 74·61%              | 52·13%           | 43·09%              |
| Wales                  | 190 (32·0%)        | 40·53%               | 12·63%            | 75·26%              | 41·94%           | 38·17%              |
| Scotland               | 210 (35·4%)        | 37·91%               | 13·74%            | 73·93%              | 51·92%           | 36·54%              |
| Gender:                |                    |                      |                   |                     |                  |                     |
| Male                   | 374 (63·1 %)       | 37·43%               | 13·90%            | 72·99%              | 47·33%           | 41·98%              |
| Female                 | 208 (35·1 %)       | 41·35%               | 12·02%            | 77·40%              | 51·44%           | 31·25%              |
| Missing                | 11 (1·9 %)         |                      |                   |                     |                  |                     |
| Age:                   |                    |                      |                   |                     |                  |                     |
| 30 - 40 years          | 119 (20·1 %)       | 41·18%               | 16·67%            | 80·99%              | 50·83%           | 37·50%              |
| 41 - 50 years          | 267 (45·5 %)       | 35·58%               | 12·36%            | 74·16%              | 47·49%           | 40·15%              |
| 51 - 60 years          | 184 (31·0 %)       | 42·93%               | 13·04%            | 71·74%              | 52·22%           | 37·78%              |
| >60 years              | 23 (3·9 %)         | 26·09%               | 0·00%             | 60·87%              | 28·00%           | 24·00%              |
| Speciality:            |                    |                      |                   |                     |                  |                     |
| Physician              | 171 (28·8%)        | 33·33%               | 14·04%            | 71·35%              | 47·88%           | 35·15%              |
| Surgeon                | 108 (18·2%)        | 43·52%               | 15·74%            | 69·44%              | 48·54%           | 45·63%              |
| Obstetrics/Gynaecology | 24 (4·0%)          | 37·50%               | 12·50%            | 75·00%              | 41·67%           | 25·00%              |
| Anaesthesia            | 83 (14·0%)         | 28·92%               | 13·25%            | 84·34%              | 47·56%           | 40·24%              |
| Radiology              | 41 (6·9%)          | 36·59%               | 12·20%            | 78·05%              | 46·34%           | 36·59%              |
| Psychiatry             | 47 (7·9%)          | 46·81%               | 8·51%             | 80·85%              | 52·08%           | 37·50%              |
| Pathology/Microbiology | 22 (3·7%)          | 59·09%               | 9·09%             | 72·73%              | 72·73%           | 54·55%              |
| Other                  | 93 (15·7%)         | 44·09%               | 12·90%            | 73·12%              | 47·31%           | 34·41%              |
| Missing                | 4 (0·7%)           |                      |                   |                     |                  |                     |

<sup>a</sup>After excluding missing values

### *Internal reliability and correlations between job autonomy and psychological morbidity*

All the measurements achieved very good reliability and excellent internal consistency as Cronbach's alpha for almost all of them are approximately 0·9. The non-parametric correlation

coefficients between all five measurements, age and work experience of the consultants are displayed in Table 2. Nearly all relationships have statistically significant correlations. Job autonomy was statistically significantly correlated with work-related stress, burn-out, anxiety, and depression symptoms. Moderate but significant correlation also existed for burnout with anxiety ( $\rho=0.57$ ), depression ( $\rho=-0.59$ ) and work-related stress ( $\rho=-0.49$ ). All three outcome measures were also strongly correlated with each other, more specifically, between: anxiety and depression ( $\rho=0.79$ ), work-related stress and depression ( $\rho=0.54$ ), and work-related stress and anxiety ( $\rho=0.44$ ).

**Table 2: Internal reliability and correlations between the study variables**

| Variable            | Internal reliability (Cronbach's $\alpha$ ) | Job autonomy | Burnout       | Work-related stress | Anxiety      | Depression   | Tenure       | Age          |
|---------------------|---------------------------------------------|--------------|---------------|---------------------|--------------|--------------|--------------|--------------|
| Job autonomy        | .885                                        | 5.83 (3.04)  |               |                     |              |              |              |              |
| Burnout             | .919                                        | -0.22**      | 54.59 (15.65) |                     |              |              |              |              |
| Work-related stress | .938                                        | -0.53**      | 0.49**        | 56.66 (17.52)       |              |              |              |              |
| Anxiety             | .836                                        | -0.23**      | 0.57**        | 0.44**              | 21.35 (4.91) |              |              |              |
| Depression          | .902                                        | -0.31**      | 0.59**        | 0.54**              | 0.79**       | 20.94 (5.43) |              |              |
| Tenure              | -                                           | -0.09*       | -0.02         | -0.08*              | 0.10*        | 0.04         | 11.27 (7.29) |              |
| Age                 | -                                           | 0.009**      | 0.02          | -0.13**             | 0.04         | -0.03        | 0.86**       | 47.63 (7.47) |

Note: Mean (SD) are reported diagonally; \*\*.  $p < .01$  level (1-tailed). \*.  $p < .05$  level (1-tailed).

### *Consultants' work-related stress*

Multiple Linear Regression Model 1 (Table 3) examined whether job autonomy and burnout, adjusted for consultant specialty, country and the demographic variables, were significant predictors of sampled consultants' work-related stress.  $R^2$  for the predictor model was .46 (adjusted  $R^2=.45$ ). Results show that job autonomy, burnout, gender and consultant type (anaesthetists; pathology) significantly predicted work-related stress.

**Table 3: Results for the MLR1 on Work-related Stress**

| Predictor                 | Coefficients (B) | Standardised coefficient ( $\beta$ ) | Sig. | 95.0% Confidence Interval for B |             |
|---------------------------|------------------|--------------------------------------|------|---------------------------------|-------------|
|                           |                  |                                      |      | Lower Bound                     | Upper Bound |
| (Constant)                | 63.41            |                                      | .001 | 51.78                           | 75.04       |
| Job autonomy              | -2.61            | -0.45                                | .001 | -2.99                           | -2.22       |
| Burnout                   | 0.44             | 0.40                                 | .001 | .37                             | 0.52        |
| Specialty                 |                  |                                      |      |                                 |             |
| Pathology or Microbiology | -6.42            | -0.07                                | 0.04 | -12.45                          | -0.39       |
| Surgery                   | -0.37            | 0.01                                 | 0.83 | -3.62                           | 2.89        |
| Anaesthesia               | 3.84             | 0.08                                 | 0.03 | 0.36                            | 7.32        |
| Radiology                 | 0.50             | 0.01                                 | 0.83 | -4.01                           | 5.02        |
| Psychiatry                | -1.86            | -0.03                                | 0.39 | -6.18                           | 2.45        |
| Other                     | 0.50             | 0.01                                 | 0.77 | -2.83                           | 3.82        |
| Obstetrics/Gynaecology    | 0.65             | 0.01                                 | 0.82 | -4.98                           | 6.29        |
| Physician (ref)           |                  |                                      |      |                                 |             |
| Age                       | -0.30            | -0.13                                | 0.05 | -0.61                           | .000        |
| Gender (male)             | -2.72            | -0.08                                | 0.02 | -5.07                           | -0.37       |
| Work experience (years)   | 0.05             | 0.02                                 | 0.76 | -0.26                           | .358        |
| Country                   |                  |                                      |      |                                 |             |
| Wales                     | -1.31            | -0.04                                | 0.36 | -3.93                           | 1.30        |
| England                   | -0.24            | -0.01                                | 0.86 | -2.91                           | 2.44        |
| Scotland (ref)            |                  |                                      |      |                                 |             |

Note: Dependent variable is work-related stress

One-unit increase in autonomy score corresponded with a decrease of 2.61 ( $p < .001$ ) on the work-related stress score. Similarly, one-unit increase in burnout was associated with an increase of 0.44 ( $p < .001$ ) in work-related stress. As seen in Table 3, males have an average stress score that is lower ( $B = -1.31$ ;  $p < .02$ ) than females. Compared against Physicians, Anaesthetists ( $B = 3.84$ ) had higher mean scores on work-related stress, and Pathology consultants had lower ( $B = -6.42$ ) mean scores on work-related stress.

### *Consultants' anxiety symptoms*

Multiple Linear Regression Model 2 (Table 4) observed job autonomy, and burnout to predict consultants' anxiety levels, when adjusted for consultants' specialty, country of work and the demographic variables ( $R^2 = .40$  and adjusted  $R^2 = .38$ ). More specifically a one-unit increase in job autonomy corresponded with a decrease of 0.16 ( $p < .05$ ) on consultants' anxiety score. Similarly, a one-unit increase in burnout corresponded with a 0.18 ( $p < .01$ ) increase in anxiety.

**Table 4: Results for the MLR2 on anxiety**

| Predictor                 | Coefficients (B) | Standardised coefficient (β) | Sig. | 95.0% Confidence Interval for B |             |
|---------------------------|------------------|------------------------------|------|---------------------------------|-------------|
|                           |                  |                              |      | Lower Bound                     | Upper Bound |
| (Constant)                | 17.28            |                              | .001 | 13.81                           | 20.736      |
| Job autonomy              | -.16             | -0.09                        | .008 | -.27                            | -.040       |
| Burnout                   | .18              | 0.57                         | .001 | .16                             | .19         |
| Specialty                 |                  |                              |      |                                 |             |
| Pathology or Microbiology | -.84             | -0.03                        | .360 | -2.63                           | -.96        |
| Surgery                   | .84              | 0.07                         | .088 | -.13                            | 1.81        |
| Anaesthesia               | .36              | 0.03                         | .491 | -.67                            | 1.40        |
| Radiology                 | -.44             | -0.02                        | .517 | -1.79                           | -.90        |
| Psychiatry                | -.34             | -0.02                        | .603 | -1.63                           | -.94        |
| Other                     | .72              | 0.06                         | .151 | -.26                            | 1.71        |
| Obstetrics/Gynaecology    | 1.70             | 0.07                         | .047 | .03                             | 3.38        |
| Physician (ref)           |                  |                              |      |                                 |             |
| Age                       | -.17             | -0.26                        | .001 | -.26                            | -.08        |
| Gender (male)             | 1.23             | 0.12                         | .001 | .53                             | 1.93        |
| Work experience (years)   | .19              | 0.28                         | .001 | .09                             | .28         |
| Country                   |                  |                              |      |                                 |             |
| Wales                     | .81              | 0.08                         | .041 | .04                             | 1.59        |
| England                   | .28              | 0.03                         | .498 | -.52                            | 1.07        |
| Scotland (ref)            |                  |                              |      |                                 |             |

Note: Dependent variable is anxiety symptoms

In terms of demographics, with one-unit (i.e., year) increase in age, consultants' anxiety score decreased by 0.17 ( $p < .01$ ). Males had, on average, an anxiety score that was 1.23 times higher than female. More experience was associated with higher anxiety ( $B = 0.19$ ,  $p < .001$ ). Similarly, consultants from Wales had more anxiety symptoms than compared consultants from Scotland ( $B = 0.81$ ;  $p < .05$ ). Obstetrics & Gynaecology consultants reported more anxiety symptoms than Physicians.

#### *Consultants' depressive symptoms*

Multiple Linear Regression Model 3 (Table 5) found job autonomy, burnout, specialty of Obstetrics & Gynaecology, age, work experience, and country of work significantly predicted the level of consultants' depressive symptoms ( $R^2 = .43$ ; adjusted  $R^2 = .42$ ).

**Table 5: Results for MLR 3 on depressive symptoms**

| Predictor                 | Coefficients (B) | Standardised coefficient (β) | Sig. | 95·0% Confidence Interval for B |             |
|---------------------------|------------------|------------------------------|------|---------------------------------|-------------|
|                           |                  |                              |      | Lower Bound                     | Upper Bound |
| (Constant)                | 18·66            |                              | ·001 | 14·94                           | 22·38       |
| Job autonomy Score        | ·28              | -1·58                        | ·001 | ·41                             | ·16         |
| Burnout Score             | ·20              | 0·59                         | ·001 | ·18                             | ·23         |
| Specialty                 |                  |                              |      |                                 |             |
| Pathology or Microbiology | ·81              | -0·3                         | ·411 | -2·74                           | 1·12        |
| Surgery                   | ·67              | 0·05                         | ·206 | ·37                             | 1·71        |
| Anaesthesia               | ·21              | -0·01                        | ·710 | -1·32                           | ·90         |
| Radiology                 | ·63              | -0·03                        | ·394 | -2·07                           | ·82         |
| Psychiatry                | ·06              | 0·00                         | ·927 | -1·32                           | 1·44        |
| Other                     | ·43              | 0·03                         | ·430 | ·64                             | 1·49        |
| Obstetrics/Gynaecology    | 1·78             | 0·07                         | ·053 | ·03                             | 3·58        |
| Physician (ref)           |                  |                              |      |                                 |             |
| Age                       | ·21              | -0·29                        | ·001 | ·31                             | ·11         |
| Gender (male)             | ·09              | 0·01                         | ·807 | ·66                             | ·85         |
| Work experience (years)   | ·20              | 0·27                         | ·001 | ·11                             | ·30         |
| Country                   |                  |                              |      |                                 |             |
| Wales                     | ·74              | 0·43                         | ·081 | ·09                             | 1·58        |
| England                   | ·10              | 0·44                         | ·824 | ·76                             | ·95         |
| Scotland (ref)            |                  |                              |      |                                 |             |

Note: Dependent variable is depressive symptoms

For the significant predictors (refer to Table 5), lack of job autonomy negatively predicted the level of depressive symptoms ( $B=0\cdot28$ ,  $p<0\cdot001$ ). One-unit increase on burnout was associated with an increase of  $0\cdot20$  in the number of depressive symptoms reported. Consultants working in Obstetrics & Gynaecology reported more depressive symptoms ( $B=1\cdot78$ ,  $p<0\cdot10$ ) than Physicians. In terms of age, each increase in year was associated with  $0\cdot21$  ( $p<0\cdot01$ ) fewer depressive symptoms reported. Experience was also associated with more depressive symptoms ( $B=0\cdot20$ ,  $p<0\cdot01$ ).

## Discussion

This study aimed to examine the link between job autonomy and burnout with work-related stress, depression and anxiety symptoms. The analyses found that both study hypotheses were supported, indicating that job autonomy and burnout were associated with the three adverse health outcomes. Furthermore, examination of the prevalence rates of burnout, work-related



1  
2  
3 stress, depressive symptoms and anxiety symptoms reveal that our study of UK consultants  
4 observed a higher prevalence rates than those observed by previous studies<sup>1,2,26,27</sup>. While the  
5 nature of the study design does not allow for causal explanations and is convenience sample, the  
6 current study provides a useful snapshot of the current state of psychological morbidity among  
7 the UK consultants and helps to fulfil some of the existing gaps in the current literature on  
8 consultants' psychological morbidity.  
9

10  
11  
12  
13  
14  
15  
16  
17  
18 These results provide additional evidence of the importance of work-related factors, by  
19 highlighting their significance due to their association with psychological morbidity.  
20 Importantly, these health outcomes are not accounted for merely by social and demographic  
21 factors<sup>4,5</sup>. The finding that high job autonomy is associated with lower work-related stress, and  
22 fewer anxiety and depressive symptoms, is congruent with the theoretical propositions  
23 advocating its beneficial motivational<sup>11,12</sup> and health enhancing<sup>16</sup> properties. Moreover,  
24 enhancing job autonomy allows doctors the freedom to pursue more meaningful tasks and more  
25 efficient ways of working, both of which have been postulated to lead to improved worker  
26 health<sup>13,14</sup> and patient care<sup>31</sup>. This is consistent with the empirical evidence drawn from more  
27 general samples demonstrating a beneficial link between job autonomy with performance,  
28 motivational and health outcomes<sup>13,14,15,17</sup>.  
29  
30  
31  
32  
33  
34  
35  
36  
37  
38  
39  
40  
41  
42  
43

44 Another important contribution of this study lies in the observation that, within this  
45 surveyed sample of consultants, burnout was significantly associated with psychological  
46 morbidity. This is concerning in the light of the high prevalence of burnout among UK  
47 consultants; highlighted in this study, and in past related studies<sup>3,4</sup>. With more serious measures  
48 of psychological morbidity (such as anxiety and depression) being a possible consequence of  
49 burnout, targeted interventions preventing or mitigating such issues should be viewed as a clear  
50  
51  
52  
53  
54  
55  
56  
57  
58  
59  
60

1  
2  
3 organizational priority within the NHS. This is congruent with the evidence<sup>30</sup> that comprehensive  
4 interventions, simultaneously targeting organisational, material and work-time related conditions  
5 may be more beneficial to worker health than interventions only targeting the individual. Even if  
6 causality may not be established in this study, longitudinal evidence from elsewhere supports  
7 burnout's role as an antecedent to psychological morbidity<sup>9</sup>.  
8  
9  
10  
11  
12  
13

### 14 15 *Limitations*

16  
17  
18 A number of limitations exist within the context of this study that need to be  
19 acknowledged when reviewing the study results. First, it is a cross-sectional study design. As  
20 such, any interpretation of causality is not appropriate, as it is plausible that the relationship  
21 between job autonomy, burnout, depressive and anxiety symptoms, and work-related stress may  
22 be reciprocal in nature<sup>19</sup>. For example, McManus and colleagues<sup>29</sup> found that lack of support and  
23 workload among doctors was predicted by burnout levels from six years earlier. This lends  
24 credibility to the argument that doctors with burnout, or psychological morbidity in general, may  
25 in turn perceive more difficult working conditions. The second limitation recognises that all  
26 study variables were drawn from self-report data of the individual consultant, making it  
27 vulnerable to common method bias; but, at the same time, this is an established method in  
28 quantitative research. Third, although the study sample size is guided by similar studies in the  
29 past<sup>20</sup>, the sample size is smaller than that of past research into the prevalence of psychological  
30 morbidity amongst UK consultants<sup>1,2</sup>. Therefore, care needs to be taken in generalizing any  
31 findings to the wider profession or sector. Finally, although qualitative research has already  
32 suggested that consultants feel a reduction in job autonomy<sup>10</sup>; precise information on the existing  
33 quantitative levels of job autonomy among UK consultants remains unknown.  
34  
35  
36  
37  
38  
39  
40  
41  
42  
43  
44  
45  
46  
47  
48  
49  
50  
51  
52  
53  
54  
55  
56  
57  
58  
59  
60

### *Implications and conclusions*

Considering the research suggesting an erosion of job autonomy among consultants in the current NHS environment<sup>10</sup>, results of this study suggest a significant negative association between this work characteristic, and increased levels of depressive and anxiety symptoms and work-related stress. This observation merits substantive consideration and, in turn, action at policy and practice levels within the NHS. If burnout among consultants is associated with depression or anxiety, this can have serious ramifications on their ability to recover and continue as an effective part of the workforce. This problem, therefore, should be viewed as a key organizational issue by the NHS. This should create an impetus for the government, healthcare leaders and other appropriate decision makers to consider how future organizational decisions in the NHS may further impact on consultants' job autonomy; and how it can be improved. Consistent results in the wider literature have already demonstrated that low job autonomy predicts poorer performance<sup>13,14</sup>, but the results here demonstrate a significant association to consultants' self-reported psychological morbidity.

Similarly, for the first time, this study provides empirical support that burnout is significantly associated with consultants' psychological morbidity. This study yields important new evidence of the health-supporting role of job autonomy and predicative association of burnout to psychological morbidity within a sample of NHS consultants. These findings strongly highlight the value of workplace health interventions targeted at adapting working conditions and proactively managing burnout among the NHS staff. Ultimately, interventions to address job autonomy and burnout among consultants are important, not only for the NHS' ability to provide safe and high quality care<sup>5</sup>; but to maintain and retain a healthy and high performing workforce<sup>6</sup>.

## Other Information

### *Funding*

Research & Development department, Hywel Dda University Health Board.

### *Contributors*

ASAK and JH were responsible for the study concept and design. ASAK and KT drafted the first version of the report. KT was responsible for the literature search. KT also provided critical revision of the manuscript as it went through the revision process, and agreed to submit the report for publication. MSI did the data management and statistical analyses. All authors contributed to the content and critical revision of the report, and agreed to submit the report for publication.

### *Declaration of interests*

We have no competing interests to declare.

### *Acknowledgements*

We would like to thank all those who helped to collect the data. Professor Steve Bain, University of Swansea, was instrumental in making it easier to collect the data from Welsh Health Boards. Professor Graham Leese, University of Dundee, helped to create connections in Scotland to collect data from various hospitals. Consultant colleagues not only completed the questionnaire, they also provided positive feedback to ASAK. We are grateful to all human resource officers for helping ASAK to circulate the questionnaire web-link in respective hospitals.

## References

1. Ramirez AJ, Graham J, Richards MA, Cull A, Gregory WM. Mental health of hospital consultants: The effects of stress and satisfaction at work. *Lancet*. 1996; 347(9003): 724-728. doi: 10.1016/S0140-6736(96)90077-X.
2. Taylor C, Graham J, Potts HWW, Richards MA, Ramirez AJ. Changes in mental health of UK hospital consultants since the mid-1990s. *Lancet*. 2005; 366(9487): 742-744. doi:10.1016/S0140-6736(05)67178-4.
3. Mata DA, Ramos MA, Bansal N, et al. Prevalence of Depression and Depressive Symptoms Among Resident Physicians. *Jama*. 2015; 314(22): 2373-. doi:10.1001/jama.2015.15845.
4. Prins JT, Gazendam-Donofrio SM, Tubben BJ, van der Heijden FMMA, van de Wiel HBM, Hoekstra-Weebers JEHM. Burnout in medical residents: A review. *Med Educ*. 2007; 41(8): 788-800. doi:10.1111/j.1365-2923.2007.02797.x.
5. Joules N, Williams DM, Thompson AW. Depression in resident physicians: A systematic review. *Open J Depress*. 2014; 3(3): 89-100. doi:10.4236/ojd.2014.33013.
6. Tziner A, Rabenu E, Radomski R, Belkin A. Work stress and turnover intentions among hospital physicians: The mediating role of burnout and work satisfaction. *Rev Psicol del Trab y las Organ*. 2015; 31(3): 207-213. doi:10.1016/j.rpto.2015.05.001.
7. Rodriguez-Jareno MC, Demou E, Vargas-Prada S, et al. European Working Time Directive and doctors' health: A systematic review of the available epidemiological evidence. *BMJ Open*. 2014; 4(7): e004916. doi: 10.1136/bmjopen-2014-004916.
8. Griffin JM, Greiner BA, Stansfeld SA, Marmot M. The effect of self-reported and observed job conditions on depression and anxiety symptoms: A comparison of theoretical models. *J Occup Health Psychol*. 2007; 12(4): 334-349. doi:10.1037/1076-8998.12.4.334.
9. Hakanen JJ, Schaufeli WB. Do burnout and work engagement predict depressive symptoms and life satisfaction? A three-wave seven-year prospective study. *J Affect Disord*. 2012; 141(2-3): 415-424. doi:10.1016/j.jad.2012.02.043.

10. Martin G, Sieber S, Howieson B, Bushfield S. *The Changing Experience of Work of Consultants in NHS Scotland.*; 2015.
11. Hackman JR, Oldham GR. *Work Redesign.* Reading, MA: Addison-Wesley; 1980.
12. Deci EL, Ryan RM. *Intrinsic Motivation and Self-Determination in Human Behavior.* New York, NY: Plenum Publishing Co.; 1985.
13. Humphrey SE, Nahrgang JD, Morgeson FP. Integrating motivational, social, and contextual work design features: A meta-analytic summary and theoretical extension of the work design literature. *J Appl Psychol.* 2007; 92(5): 1332-1356. doi:10.1037/0021-9010.92.5.1332.
14. Fried Y, Ferris GR. The validity of the Job Characteristics Model: A review and meta-analysis. *Pers Psychol.* 1987; 40(2): 287-322. doi:10.1111/j.1744-6570.1987.tb00605.x.
15. Stansfeld S, Candy B. Psychosocial work environment and mental health- A meta-analytic and mental review. *Scand J Work Environ Heal.* 2006; 32(6): 443-462. doi:10.5271/sjweh.1050.
16. Karasek R, Theorell. *Healthy work: Stress, productivity and the reconstruction of working life.* New York, NY: Basic Books; 1990.
17. Nieuwenhuijsen K, Bruinvels D, Frings-Dresen M. Psychosocial work environment and stress-related disorders, a systematic review. *Occup Med (Lond)* 2010; 60(4): 277-286. doi: 10.1093/occmed/kqq081.
18. Shanafelt TD, Hasan O, Dyrbye LN, et al. Changes in burnout and satisfaction with work-life balance in physicians and the general US working population between 2011 and 2014. *Mayo Clin Proc.* 2015; 90(12): 1600-1613. doi:10.1016/j.mayocp.2015.08.023.
19. McManus IS, Winder BC, Gordon D. The causal link between stress and burnout in a longitudinal study of UK doctors. *Lancet.* 2002; 359: 2089-2090.
20. Agius RM, Blenkin H, Deary IJ, Zealley HE, Wood R a. Survey of perceived stress and work demands of consultant doctors. *Occup Environ Med.* 1996; 53(4): 217-224.

- 1
- 2
- 3 21. Bakker AB. *The Job Demands–Resources Questionnaire*. Rotterdam, the Netherlands;
- 4 2014.
- 5
- 6
- 7 22. Maslach C, Jackson SE. *The Maslach Burnout Inventory Manual*. 2nd ed. Palo Alto, CA:
- 8 Consulting Psychologists Press; 1986.
- 9
- 10
- 11 23. Spielberger CD. *State-Trait Personality Inventory (STPI) Research Manual*. Mind
- 12 Garden Inc; 1995.
- 13
- 14
- 15 24. von Elm E, Altman DG, Egger M, et al: Strengthening the Reporting of Observational
- 16 Studies in Epidemiology (STROBE) statement: guidelines for reporting observational
- 17 studies. *BMJ* 2007; 335: 806–808.
- 18
- 19
- 20
- 21 25. Williams S, Cooper CL. *Occupational Stress Indicator*. Windsor, UK: ASE; 1997.
- 22
- 23
- 24 26. Burbeck R. Occupational stress in consultants in accident and emergency medicine: a
- 25 national survey of levels of stress at work. *Emerg Med J*. 2002; 19(3): 234-238.
- 26 doi:10.1136/emj.19.3.234.
- 27
- 28
- 29 27. Coomber S. Stress in UK intensive care unit doctors. *Br J Anaesth*. 2002; 89(6): 873-881.
- 30 doi:10.1093/bja/aef273.
- 31
- 32
- 33 28. Ahola K, Honkonen T, Kivimäki M, et al. Contribution of Burnout to the Association
- 34 Between Job Strain and Depression: the Health 2000 Study. *J Occup Environ Med*. 2006;
- 35 48(10): 1023-1030. doi:10.1097/01.jom.0000237437.84513.92.
- 36
- 37
- 38 29. McManus IC, Keeling A, Paice E. Stress, burnout and doctors' attitudes to work are
- 39 determined by personality and learning style: A twelve year longitudinal study of UK
- 40 medical graduates. *BMC Med*. 2004; 2: 12-29. doi: 10.1186/1741-7015-2-29.
- 41
- 42
- 43 30. Montano D, Hoven H, Siegrist J. Effects of organisational-level interventions at work on
- 44 employees' health: a systematic review. *BMC Public Health*. 2014 Feb 8; 14(1): 135.
- 45
- 46
- 47 31 Krämer T, Schneider A, Spieß E, Angerer P, Weigl M. Associations between job
- 48 demands, work-related strain and perceived quality of care: a longitudinal study among
- 49 hospital physicians. *International Journal for Quality in Health Care*. 2016 Sep 27.
- 50
- 51
- 52
- 53
- 54
- 55
- 56
- 57
- 58
- 59
- 60

**STROBE Checklist for: “Job Autonomy and Burnout as Correlates of Psychological Morbidity and Work-related Stress: A Cross-sectional Study of NHS Consultants”.**

STROBE Statement—Checklist of items that should be included in reports of *cross-sectional studies*

|                           | Item No | Recommendation                                                                                                                                                                       | Location                                              |
|---------------------------|---------|--------------------------------------------------------------------------------------------------------------------------------------------------------------------------------------|-------------------------------------------------------|
| <b>Title and abstract</b> | 1       | (a) Indicate the study’s design with a commonly used term in the title or the abstract                                                                                               | In title the term “cross-sectional” is included       |
|                           |         | (b) Provide in the abstract an informative and balanced summary of what was done and what was found                                                                                  | Abstract based on the journal’s structure is included |
| <b>Introduction</b>       |         |                                                                                                                                                                                      |                                                       |
| Background/rationale      | 2       | Explain the scientific background and rationale for the investigation being reported                                                                                                 | Pg. 2 of the manuscript, paragraph 1.                 |
| Objectives                | 3       | State specific objectives, including any pre-specified hypotheses                                                                                                                    | Pg. 2 under “Aims and Hypotheses”                     |
| <b>Methods</b>            |         |                                                                                                                                                                                      |                                                       |
| Study design              | 4       | Present key elements of study design early in the paper                                                                                                                              | Pg. 3 under “study design, setting and population”    |
| Setting                   | 5       | Describe the setting, locations, and relevant dates, including periods of recruitment, exposure, follow-up, and data collection                                                      | Pg. 3 under “study design, setting and population”    |
| Participants              | 6       | (a) Give the eligibility criteria, and the sources and methods of selection of participants                                                                                          | Pg. 3 under “study design, setting and population”    |
| Variables                 | 7       | Clearly define all outcomes, exposures, predictors, potential confounders, and effect modifiers. Give diagnostic criteria, if applicable                                             | Variables are introduced in the Introduction          |
| Data sources/ measurement | 8*      | For each variable of interest, give sources of data and details of methods of assessment (measurement). Describe comparability of assessment methods if there is more than one group | Pg. 3 under “Measures”                                |
| Bias                      | 9       | Describe any efforts to address potential sources of bias                                                                                                                            | Pg. 7 (under study design, setting and population)    |
| Study size                | 10      | Explain how the study size was arrived at                                                                                                                                            | Pg. 3 under “study design, setting and population”    |
| Quantitative variables    | 11      | Explain how quantitative variables were handled in the analyses. If applicable, describe which groupings were chosen and why                                                         | Pg. 5 under “Statistical analysis”                    |



|    |                     |     |                                                                                                                                                                                                              |                                                    |
|----|---------------------|-----|--------------------------------------------------------------------------------------------------------------------------------------------------------------------------------------------------------------|----------------------------------------------------|
| 1  |                     |     |                                                                                                                                                                                                              |                                                    |
| 2  |                     |     |                                                                                                                                                                                                              |                                                    |
| 3  |                     |     |                                                                                                                                                                                                              |                                                    |
| 4  | Statistical methods | 12  | (a) Describe all statistical methods, including those used to control for confounding                                                                                                                        | Pg. 5 under “Statistical analysis”                 |
| 5  |                     |     |                                                                                                                                                                                                              |                                                    |
| 6  |                     |     | (b) Describe any methods used to examine subgroups and interactions                                                                                                                                          | Not applicable                                     |
| 7  |                     |     |                                                                                                                                                                                                              |                                                    |
| 8  |                     |     | (c) Explain how missing data were addressed                                                                                                                                                                  | Pg 5 under “Statistical analysis”                  |
| 9  |                     |     | (d) If applicable, describe analytical methods taking account of sampling strategy                                                                                                                           | Pg. 7 (under study design, setting and population) |
| 10 |                     |     |                                                                                                                                                                                                              |                                                    |
| 11 |                     |     | (e) Describe any sensitivity analyses                                                                                                                                                                        | Not applicable                                     |
| 12 |                     |     |                                                                                                                                                                                                              |                                                    |
| 13 | <b>Results</b>      |     |                                                                                                                                                                                                              |                                                    |
| 14 | Participants        | 13* | (a) Report numbers of individuals at each stage of study—eg numbers potentially eligible, examined for eligibility, confirmed eligible, included in the study, completing follow-up, and analysed            | Pg. 3 under “study design, setting and population” |
| 15 |                     |     |                                                                                                                                                                                                              |                                                    |
| 16 |                     |     | (b) Give reasons for non-participation at each stage                                                                                                                                                         | Not applicable                                     |
| 17 |                     |     | (c) Consider use of a flow diagram                                                                                                                                                                           | Not applicable                                     |
| 18 |                     |     |                                                                                                                                                                                                              |                                                    |
| 19 | Descriptive data    | 14* | (a) Give characteristics of study participants (eg demographic, clinical, social) and information on exposures and potential confounders                                                                     | Table 1                                            |
| 20 |                     |     |                                                                                                                                                                                                              |                                                    |
| 21 |                     |     | (b) Indicate number of participants with missing data for each variable of interest                                                                                                                          | Table 1                                            |
| 22 | Outcome data        | 15* | Report numbers of outcome events or summary measures                                                                                                                                                         | Table 2                                            |
| 23 | Main results        | 16  | (a) Give unadjusted estimates and, if applicable, confounder-adjusted estimates and their precision (eg, 95% confidence interval). Make clear which confounders were adjusted for and why they were included | Tables 2-5                                         |
| 24 |                     |     |                                                                                                                                                                                                              |                                                    |
| 25 |                     |     | (b) Report category boundaries when continuous variables were categorized                                                                                                                                    | Not applicable                                     |
| 26 |                     |     |                                                                                                                                                                                                              |                                                    |
| 27 |                     |     | (c) If relevant, consider translating estimates of relative risk into absolute risk for a meaningful time period                                                                                             | Not applicable                                     |
| 28 |                     |     |                                                                                                                                                                                                              |                                                    |
| 29 | Other analyses      | 17  | Report other analyses done—eg analyses of subgroups and interactions, and sensitivity analyses                                                                                                               | Tables 2-5                                         |
| 30 |                     |     |                                                                                                                                                                                                              |                                                    |
| 31 | <b>Discussion</b>   |     |                                                                                                                                                                                                              |                                                    |
| 32 | Key results         | 18  | Summarise key results with reference to study objectives                                                                                                                                                     | Pg. 11, first paragraph of discussion              |
| 33 |                     |     |                                                                                                                                                                                                              |                                                    |
| 34 | Limitations         | 19  | Discuss limitations of the study, taking into account sources of potential bias or imprecision. Discuss both direction and magnitude of any potential bias                                                   | Pg. 13 under “limitations”                         |
| 35 |                     |     |                                                                                                                                                                                                              |                                                    |
| 36 | Interpretation      | 20  | Give a cautious overall interpretation of results considering objectives, limitations, multiplicity of analyses, results from similar studies, and other relevant evidence                                   | Discussion section                                 |
| 37 |                     |     |                                                                                                                                                                                                              |                                                    |
| 38 | Generalisability    | 21  | Discuss the generalisability (external validity) of the study results                                                                                                                                        | Pg. 14 under “Implications and                     |
| 39 |                     |     |                                                                                                                                                                                                              |                                                    |
| 40 |                     |     |                                                                                                                                                                                                              |                                                    |
| 41 |                     |     |                                                                                                                                                                                                              |                                                    |
| 42 |                     |     |                                                                                                                                                                                                              |                                                    |
| 43 |                     |     |                                                                                                                                                                                                              |                                                    |
| 44 |                     |     |                                                                                                                                                                                                              |                                                    |
| 45 |                     |     |                                                                                                                                                                                                              |                                                    |
| 46 |                     |     |                                                                                                                                                                                                              |                                                    |
| 47 |                     |     |                                                                                                                                                                                                              |                                                    |

conclusions”

**Other information**

|         |    |                                                                                                                                                               |                |
|---------|----|---------------------------------------------------------------------------------------------------------------------------------------------------------------|----------------|
| Funding | 22 | Give the source of funding and the role of the funders for the present study and, if applicable, for the original study on which the present article is based | Not applicable |
|---------|----|---------------------------------------------------------------------------------------------------------------------------------------------------------------|----------------|

\*Give information separately for exposed and unexposed groups.

**Note:** An Explanation and Elaboration article discusses each checklist item and gives methodological background and published examples of transparent reporting. The STROBE checklist is best used in conjunction with this article (freely available on the Web sites of PLoS Medicine at <http://www.plosmedicine.org/>, Annals of Internal Medicine at <http://www.annals.org/>, and Epidemiology at <http://www.epidem.com/>). Information on the STROBE Initiative is available at [www.strobe-statement.org](http://www.strobe-statement.org).

# BMJ Open

## Psychosocial Work Characteristics, Burnout, Psychological Morbidity Symptoms and Early Retirement Intentions: A Cross-sectional Study of NHS Consultants in the United Kingdom.

|                                 |                                                                                                                                                                                                                                                                                                                                                 |
|---------------------------------|-------------------------------------------------------------------------------------------------------------------------------------------------------------------------------------------------------------------------------------------------------------------------------------------------------------------------------------------------|
| Journal:                        | <i>BMJ Open</i>                                                                                                                                                                                                                                                                                                                                 |
| Manuscript ID                   | bmjopen-2017-018720.R1                                                                                                                                                                                                                                                                                                                          |
| Article Type:                   | Research                                                                                                                                                                                                                                                                                                                                        |
| Date Submitted by the Author:   | 08-Feb-2018                                                                                                                                                                                                                                                                                                                                     |
| Complete List of Authors:       | Khan, Atir; Medicine<br>Teoh, Kevin; Birkbeck University of London, Department of Organizational Psychology<br>Islam, Saiful; Swansea University, College of Medicine<br>Hassard, Juliet; University of Nottingham, Centre for Organisational Health and Development, Institute of Mental Health, Division of Psychiatry and Applied Psychology |
| <b>Primary Subject Heading</b>: | Health services research                                                                                                                                                                                                                                                                                                                        |
| Secondary Subject Heading:      | Health policy, Medical management                                                                                                                                                                                                                                                                                                               |
| Keywords:                       | Psychological Morbidity, Autonomy, burnout, working conditions, Retirement Intentions                                                                                                                                                                                                                                                           |
|                                 |                                                                                                                                                                                                                                                                                                                                                 |

SCHOLARONE™  
Manuscripts

# Psychosocial Work Characteristics, Burnout, Psychological Morbidity Symptoms and Early Retirement Intentions: A Cross-sectional Study of NHS Consultants in the United Kingdom.

Atir Khan<sup>1</sup>, Kevin Teoh<sup>2</sup>, Saiful Islam<sup>3</sup>, Juliet Hassard<sup>4</sup>.

<sup>1</sup>Consultant Physician Diabetes & Endocrinology, Diabetes Centre, Glangwili Hospital, Hywel Dda University Health Board, Carmarthen, SA31 2AF, U.K.

<sup>2</sup>Lecturer, Department of Organizational Psychology, Birkbeck University of London, London, WC1E 7HX, U.K.

<sup>3</sup>Statistician, Swansea Trials Unit, College of Medicine, Swansea University, Swansea, SA2 8PP, U.K.

<sup>4</sup> Assistant Professor in Occupational Health Psychology, Centre for Organisational Health and Development, Institute of Mental Health, Division of Psychiatry and Applied Psychology, University of Nottingham, Nottingham, NG7 2TU, U.K.

## Corresponding Author

Dr Atir Sultan Ali Khan, Diabetes Centre, Glangwili Hospital, Hywel Dda University Health Board, Carmarthen, SA31 2AF, U.K.

[atir.khan45@gmail.com](mailto:atir.khan45@gmail.com)

Tel: +44-1267-227-869

## Data Sharing Statement

Individual participant data collected under this study were deidentified which are reported in the form of tables. The original proposal of the study will be available upon request. Deidentified data will be shared for non-commercial research purpose given the consent of the lead author after the publications as per guidelines of the BMJ Open.

**Licence To Publish Statement** "I, Dr Atir Sultan Ali Khan, the Corresponding Author of this article contained within the original manuscript which includes any diagrams & photographs within and any related or stand-alone film submitted (the Contribution") has the right to grant on behalf of all authors and does grant on behalf of all authors, a licence to the BMJ Publishing Group Ltd and its licensees, to permit this Contribution (if accepted) to be published in the BMJ and any other BMJ Group products and to exploit all subsidiary rights, as set out in our licence set out at: <http://www.bmj.com/about-bmj/resources-authors/forms-policies-and-checklists/copyright-open-access-and-permission-reuse>."

**Transparency Declaration** Lead author (Dr Atir Khan) affirms that the manuscript is an honest, accurate, and transparent account of the study being reported; that no important aspects of the study have been omitted; and that any discrepancies from the study as planned (and, if relevant, registered) have been explained.

## Abstract

**OBJECTIVES** The objectives of this study are twofold. First, to examine the direct effect of psychosocial work characteristics (as measured by job autonomy and work-related pressure) in relation to self-reported psychological morbidity symptoms and early retirement intentions among a sample of hospital consultants in the National Health Service (NHS). Second, to investigate burnout as mediating variable (i.e., indirect effect) of these postulated associations.

**DESIGN and SETTING** A cross-sectional observational study.

**PARTICIPANTS** 593 NHS consultants (Male = 63.1%) from hospitals in England, Scotland and Wales.

**MEASURES** Self-reported online questionnaires on work-related pressure and job autonomy (Job Demands-Resources Questionnaire); emotional exhaustion and depersonalisation (Maslach Burnout Inventory); depressive and anxiety symptoms (State Trait Personality Inventory); and a single-item on early retirement intention.

**RESULTS** Multiple linear regressions examined direct effects, with indirect effects examined using Hayes' PROCESS macro. Job autonomy negatively predicted the frequency of NHS consultants' anxiety and depressive symptoms, and their intention to retire early. No direct relationships involving work-related pressure were observed. Both emotional exhaustion and depersonalisation mediated the relationships that work-related pressure and job autonomy had with symptoms of psychological morbidities. Only emotional exhaustion mediated the relationships where early retirement intention was the outcome. Results of this study observed high prevalence rates across all adverse health measures within this sample, namely: emotional exhaustion (38.7%), depersonalisation (13%), anxiety symptoms (43.1%), and depressive symptoms (36.1%).

**CONCLUSIONS** This is the first study to observe job autonomy to associate with the number of psychological morbidity symptoms and early retirement intention in a sample of NHS consultants. Burnout dimensions mediated these relationships, indicating that interventions need to focus on enhancing working conditions and addressing burnout among NHS consultants before more severe symptoms of psychological morbidity are reported. This study has implications for NHS policy makers and senior leadership.

## STRENGTHS AND LIMITATIONS OF THIS STUDY

- This is the first study to demonstrate the mediating role of burnout between psychosocial work characteristics of NHS consultants and their reported depressive and anxiety symptoms and intentions to seek early retirement.
- A substantive proportion of surveyed NHS consultants reported experiencing: emotion exhaustion, pervasive feelings of cynicisms regarding work, and excessive anxiety and depression symptoms.
- Mediations were examined using Hayes' PROCESS Model 4 macro with bootstrapping, which generates more accurate confidence intervals than other more commonly used mediation methods. This is a cross-sectional study design. As such, any interpretation of causality is not appropriate, as it is plausible that the relationship between the variables measured are reciprocal in nature.
- All study variables were drawn from self-report data of the individual consultant, making it vulnerable to common method bias.
- We were not able determine the response rate as we are unaware as to how many NHS trusts and health boards who agreed to participate actually followed through and sent the survey link to their consultants.

## Introduction

The National Health Service (NHS) is one of the world's largest employers, with 1.3 million staff in England and Wales caring for an estimated 243 million patients annually<sup>1</sup>. For this system to continue to provide safe, sustainable and patient-centred care the wellbeing and retention of its workforce are critical considerations. The NHS performs comparatively worse across many measures of staff wellbeing; with sickness absence rates, on average, 27% higher than the UK public sector and 46% higher across all sectors<sup>2</sup>. Understanding the nature and impact of psychosocial working conditions on medical professionals' work-related wellbeing is, we believe, of clear empirical importance. In addition, its practical value in the development of evidenced-based workplace preventative solutions cannot be understated.

### *Psychosocial work characteristics and work-related wellbeing*

Exposure to poor psychosocial work characteristics (e.g., poor job autonomy, work-related pressures, injustice at work, insufficient leadership) have been linked to a myriad of work-related wellbeing (inclusive of physical, psychological, behavioural and attitudinal) outcomes, including for example: poor mental health<sup>3,4</sup>; increased health impairing behaviours (e.g., increased smoking<sup>5</sup>, alcohol consumption<sup>6</sup>); poor physical health (e.g., coronary heart disease<sup>7,8</sup>; reduced job satisfaction<sup>9</sup>; intention to quit<sup>10</sup>; and diminished organisational commitment<sup>11</sup>). In short, there is strong research to suggest that exposure to poor psychosocial work characteristics poses a clear risk to employees' health and work engagement<sup>12</sup>. However, the nature and mechanisms underpinning such associations must be examined and understood at various levels (e.g., community, sectoral, and organisational), and within various vocational groups and occupational roles.

Within the healthcare sector, much of the available research has focused on a limited number of occupational groups (e.g., nurses<sup>13,14</sup>; social workers<sup>15,16</sup>; and, to a lesser degree,

1  
2  
3 doctors<sup>17,18</sup>. While the extant literature examining doctors specifically is increasing, there has  
4 (to date) been little attempt to examine the nature of this association within a unique  
5 vocational subgroup: NHS hospital consultants. These doctors are among the most  
6 experienced and trained within this vocational group<sup>19</sup>. Their role as educators and  
7 supervisors of the next generation of doctors and nurses means their organisational  
8 contribution in the development of the current and future healthcare workforce is  
9 imperative<sup>20</sup>.

### 18 *The Mediating Role of Burnout*

21 Burnout is one of the most commonly studied wellbeing constructs within the  
22 healthcare sector<sup>21</sup>; and, in particular, as a measure of work-related wellbeing among doctors.  
23 Burnout refers to a prolonged psychological response to chronic emotional and interpersonal  
24 stresses related to work<sup>22,23</sup>, and manifests through symptoms of emotional exhaustion,  
25 depersonalisation and reduced personal accomplishment. *Emotional exhaustion* denotes being  
26 emotionally overextended and exhausted by work. *Depersonalisation* refers to an impersonal  
27 feeling towards people, and reduced *personal accomplishment* encompasses the reduced  
28 work effectiveness due to emotional exhaustion and depersonalisation. Studies<sup>21,24,25</sup> have  
29 found strong and consistent support for the emotional exhaustion and depersonalisation  
30 dimensional factors of burnout; and are, therefore, typically viewed as its' core conceptual  
31 components. However, the evidence surrounding professional accomplishment is  
32 comparatively mixed. Consequently, personal accomplishment is generally viewed as a  
33 separate, but related entity<sup>24</sup>.

34  
35  
36  
37  
38  
39  
40  
41  
42  
43  
44  
45  
46  
47  
48  
49  
50 Evidence derived from reviews and meta-analyses demonstrate a significant  
51 association between poor psychosocial working conditions and doctors' self-reported burnout  
52 symptoms<sup>17,18</sup>. Within the extant literature, burnout has predominantly been conceptualised  
53  
54  
55  
56  
57  
58  
59  
60



1  
2  
3 and investigated as the outcome of a poor psychosocial work environment. However, there is  
4  
5 increasing attention being paid to the potential role of burnout as an antecedent to a range of  
6  
7 health-related, attitudinal and behavioural outcomes, including: depression and anxiety<sup>26</sup>,  
8  
9 substance abuse<sup>27</sup>, work performance<sup>28</sup>, turnover intention<sup>29</sup> and patient care<sup>30</sup>. This is not  
10  
11 surprising, as burnout depletes workers' energy and coping resources, which may results in  
12  
13 increased physiological and psychological strain<sup>31</sup>. This may, in turn, trigger and exacerbate  
14  
15 symptoms of psychological morbidity and work disengagement; and, consequently in the  
16  
17 long term, interfere with performance<sup>32</sup>. Despite this, to date limited research has sought to  
18  
19 examine burnout as a possible mediating variable in relation to doctors' perceived working  
20  
21 condition and their psychological health and experienced work-related attitudes. This study  
22  
23 aims to address this gap in knowledge.  
24  
25

### 26 27 **Study Aim**

28  
29  
30 The objectives of this study are twofold. Firstly, to examine the direct effect of  
31  
32 psychosocial work characteristics (job autonomy and work-related pressure) in relation to  
33  
34 self-reported psychological morbidity symptoms and early retirement intentions among a  
35  
36 sample of hospital consultants in the NHS. Secondly, to investigate burnout as a mediating  
37  
38 variable (i.e., indirect effect) of this postulated association. Figure 1 provides a visual  
39  
40 representation of the study's postulated direct and indirect effects among independent and  
41  
42 dependent variables.  
43  
44  
45  
46  
47  
48  
49  
50  
51  
52  
53  
54  
55  
56  
57  
58  
59  
60

[ Insert Figure 1 here ]

## Method

### *Study design and sample*

A cross-sectional quantitative survey was carried out between November and December 2015. The Human Resources departments of all the Health Boards in Wales (n=7) and Scotland (n=10) were approached to participate in this study, along with 12 NHS Trusts from England. All agreed to forward an electronic survey, administered through Bristol Online Survey, to all their consultants. It is not possible to determine how many consultants actually received the survey. We aimed to obtain a survey sample size of 500. This exceeded our power calculations assuming a total consultant population of 10,000 across these Health Boards and Trusts, a sample proportion of 50% and allowing 5% margin of error considering the finite population correction. The electronic survey yielded a response of 593 consultants. The study received ethical approval from Birkbeck University of London.

### *Measures*

Surveyed consultants provided information on socio-demographic details, work-related pressure, job autonomy, burnout, early retirement intention, and anxiety and depressive symptoms. All utilised composite measures demonstrated a satisfactory level of internal reliability.

### *Psychosocial work characteristics*

Two specific psychosocial work characteristics were examined by the current study: job autonomy and work-related pressure. The decision to examine only two (out of myriad of possible psychosocial work characteristic) was based on what the contemporary literature repeatedly highlights as particularly salient work characteristics to NHS consultants<sup>33-35</sup>. The English version of the Job Demands-Resources Questionnaire<sup>36</sup> was used to assess work-

1  
2  
3 related pressure and job autonomy. Work-related pressure consisted of four items and job  
4  
5 autonomy three items. All items were rated on a Likert scale: 1 (never) to 5 (very often).  
6

### 7 8 *Burnout*

9  
10 The Maslach Burnout Inventory<sup>22</sup> was used to quantify the two examined dimensions  
11  
12 of burnout: emotional exhaustion (9 items) and depersonalisation (5 items). Items were rated  
13  
14 on a seven-point Likert scale (0, 'never' to 6, 'every day'). All subscale items were summed  
15  
16 to create two composite scores. Higher scores are indicative of increased emotional  
17  
18 exhaustion or depersonalisation. The summed scores on the two utilised composite measures  
19  
20 were used to stratify the sample into 'high' and 'low' reference categories, with established  
21  
22 norm scores of health professionals used to inform the categorization process<sup>37,38</sup>. A  
23  
24 composite score of 27 or higher on the emotional exhausted scale and 13 or higher on the  
25  
26 depersonalisation scale were used to categorise participants in the 'high' group.  
27  
28

### 29 30 *Psychological Morbidity Symptoms*

31  
32 Symptoms of trait depression and anxiety were measured by the State Trait  
33  
34 Personality Inventory<sup>39</sup>. This 80-item inventory contains eight scales that measures state and  
35  
36 trait-related depression, anxiety, curiosity and anger. Only the ten-item scales pertaining to  
37  
38 trait-related depression and anxiety were included in this study. The scales are among the  
39  
40 most widely used for anxiety and depression with strong psychometric properties<sup>39-41</sup>. The  
41  
42 frequency of each item was rated on a four-point Likert scale (1, 'almost never' and 4,  
43  
44 'almost always'), with high scores representing more frequent experience of anxiety and  
45  
46 depressive symptoms. Although neither measure has clinically diagnostic cut-off points,  
47  
48 participants in this study with scores higher than the 75<sup>th</sup> percentile of UK working norm  
49  
50 scores were classed as high scoring ( $\geq 18$  for anxiety;  $\geq 20$  for depression).  
51  
52  
53  
54

### 55 56 *Work-related Attitudinal Outcome: Early retirement intention*

1  
2  
3            Depending on the type of scheme, NHS consultants have the option of retiring at age  
4  
5 60 (1995 section) or 65 years (2008 section). Therefore, early retirement intention was  
6  
7 assessed through one Likert-based item commonly used in epidemiological surveys of the  
8  
9 working population<sup>42</sup>: “do you think you will be doing this job when you are 60 years old”.  
10  
11 Anchored from 0 (“I would not even want to be”) to 6 “yes”.

### 12 13 14 *Statistical analysis*

15  
16            Descriptive statistics and study measures’ internal reliability were analysed.  
17  
18 Subsequently, bivariate two-tailed parametric correlations were calculated to examine the  
19  
20 statistical association between study variables. Three multiple linear regression models were  
21  
22 then carried out to examine the direct effects of the study’s independent variables (job  
23  
24 autonomy, work-related pressure, emotional exhaustion and depersonalisation) on the three  
25  
26 dependent measures: anxiety and depression symptoms, and early retirement intention. Socio-  
27  
28 demographic covariates (age, gender, speciality, country, tenure as consultant) were  
29  
30 controlled for. Assumptions underlying multivariate linear regression were assessed by  
31  
32 plotting residual errors and standardised residuals. Existence of multicollinearity was checked  
33  
34 through variance inflation factors, and Durbin-Watson tests were conducted for correlated  
35  
36 residuals. All these diagnostics fell within the acceptable ranges for each multiple linear  
37  
38 regression model. SPSS (version 22) was used for data management and statistical analysis.  
39  
40 Missing data was examined; with, in general, low levels observed (i.e., 1.9% in gender and  
41  
42 0.7% for consultant speciality). Such data was excluded from the analysis due their non-  
43  
44 significant size.  
45  
46  
47  
48

49            Hayes<sup>43</sup> PROCESS Model 4 macro was used to examine the indirect effects that  
50  
51 psychosocial work characteristics had on consultants’ psychological morbidity and turnover  
52  
53 intention. Both emotional exhaustion and depersonalisation were examined as mediators  
54  
55 within these relationships. This approach tests the indirect effect of both mediators, using a  
56  
57  
58  
59

1  
2  
3 calculation of 1000 bias-corrected bootstrapped confidence intervals (95%). Bootstrapping  
4  
5 estimates model parameters and their standard errors by the repeated sampling of the study  
6  
7 sample. These do not assume that sampling distributions are normal, which is especially  
8  
9 applicable for mediation analyses<sup>44</sup>. Therefore, bootstrapping generates more accurate  
10  
11 confidence intervals than other more commonly used mediation methods. In total six sets of  
12  
13 analyses were carried out, with one set for each relationship both predictors (work-related  
14  
15 pressure, job autonomy) and the three outcome measures (anxiety symptoms, depressive  
16  
17 symptoms, early retirement intention). The paper is reported in accordance with the STROBE  
18  
19 statement<sup>45</sup>.

## 22 23 Results

24  
25 In total, 593 responses were completed. A full demographical breakdown is presented  
26  
27 in Table 1. The sample was relatively evenly split between England (32.5%), Wales (32%)  
28  
29 and Scotland (35.4%). The majority of respondents were male (63.1%), and aged between  
30  
31 41-50 years (45.5%) and 51-60 years (31%). In total, eight speciality groups were  
32  
33 represented, with the majority of respondents identifying as physicians (28.8%), surgeons  
34  
35 (18.2%), anaesthesiologists (14%) and others' (15.7%).

36  
37  
38  
39 Table 1: Sample distribution and the proportion of the sample categorised as 'high' on the  
40  
41 examined study variables

| 42<br>43<br>44<br>45<br>46<br>47<br>48<br>49<br>50<br>51<br>52<br>53<br>54<br>55<br>56<br>57<br>58<br>59<br>60 | Characteristics of Sample | N (% <sup>a</sup> ) | 42<br>43<br>44<br>45<br>46<br>47<br>48<br>49<br>50<br>51<br>52<br>53<br>54<br>55<br>56<br>57<br>58<br>59<br>60 |                        | 42<br>43<br>44<br>45<br>46<br>47<br>48<br>49<br>50<br>51<br>52<br>53<br>54<br>55<br>56<br>57<br>58<br>59<br>60 |                          |
|----------------------------------------------------------------------------------------------------------------|---------------------------|---------------------|----------------------------------------------------------------------------------------------------------------|------------------------|----------------------------------------------------------------------------------------------------------------|--------------------------|
|                                                                                                                |                           |                     | High Emotional Exhaustion                                                                                      | High Depersonalisation | High Anxiety symptoms                                                                                          | High Depressive symptoms |
| Substantive consultant                                                                                         | 593 (100 %)               | 38.70%              | 13.00%                                                                                                         | 43.10%                 | 36.10%                                                                                                         |                          |
| Countries:                                                                                                     |                           |                     |                                                                                                                |                        |                                                                                                                |                          |
| England                                                                                                        | 193 (32.5%)               | 37.82%              | 12.95%                                                                                                         | 52.13%                 | 43.09%                                                                                                         |                          |
| Wales                                                                                                          | 190 (32.0%)               | 40.53%              | 12.63%                                                                                                         | 41.94%                 | 38.17%                                                                                                         |                          |
| Scotland                                                                                                       | 210 (35.4%)               | 37.91%              | 13.74%                                                                                                         | 51.92%                 | 36.54%                                                                                                         |                          |
| Gender:                                                                                                        |                           |                     |                                                                                                                |                        |                                                                                                                |                          |

|                            |              |        |        |        |        |
|----------------------------|--------------|--------|--------|--------|--------|
| Male                       | 374 (63.1 %) | 37.43% | 13.90% | 47.33% | 41.98% |
| Female                     | 208 (35.1 %) | 41.35% | 12.02% | 51.44% | 31.25% |
| Not specified              | 11 (1.9 %)   |        |        |        |        |
| <hr/>                      |              |        |        |        |        |
| Age:                       |              |        |        |        |        |
| 30 - 40 years              | 119 (20.1 %) | 41.18% | 16.67% | 50.83% | 37.50% |
| 41 - 50 years              | 267 (45.5 %) | 35.58% | 12.36% | 47.49% | 40.15% |
| 51 - 60 years              | 184 (31.0 %) | 42.93% | 13.04% | 52.22% | 37.78% |
| >60 years                  | 23 (3.9 %)   | 26.09% | 0.00%  | 28.00% | 24.00% |
| <hr/>                      |              |        |        |        |        |
| Speciality:                |              |        |        |        |        |
| Physician                  | 171 (28.8%)  | 33.33% | 14.04% | 47.88% | 35.15% |
| Surgeon                    | 108 (18.2%)  | 43.52% | 15.74% | 48.54% | 45.63% |
| Obstetrics/<br>Gynaecology | 24 (4.0%)    | 37.50% | 12.50% | 41.67% | 25.00% |
| Anaesthesia                | 83 (14.0%)   | 28.92% | 13.25% | 47.56% | 40.24% |
| Radiology                  | 41 (6.9%)    | 36.59% | 12.20% | 46.34% | 36.59% |
| Psychiatry                 | 47 (7.9%)    | 46.81% | 8.51%  | 52.08% | 37.50% |
| Pathology/<br>Microbiology | 22 (3.7%)    | 59.09% | 9.09%  | 72.73% | 54.55% |
| Other                      | 93 (15.7%)   | 44.09% | 12.90% | 47.31% | 34.41% |
| Not specified              | 4 (0.7%)     |        |        |        |        |

<sup>a</sup> After excluding missing values

Table 1 provides an overview of the proportion of the sample that were categorised as scoring 'high' on the examined study variables. These comparisons are not based on inferential statistics and are only for descriptive purposes. A sizable proportion of the survey sample reported a high level of depressive and anxiety symptoms. Four out of 10 consultants surveyed reported a high frequency of anxiety symptoms, and over a third of the sample were categorised as having a high degree of depressive symptoms. In relation to burnout, 38.7% of participants reported a high level of emotional exhaustion and 13% depersonalisation. The means, standard deviations and internal reliability for all study variables are presented in Table 2. Bivariate two-tailed parametric correlations among the independent and dependent measures are also provided in the same table.

Table 2: Descriptive statistics, correlations and reliability coefficients among study variables

| Variable                 | Internal reliability | 1              | 2               | 3               | 4              | 5              | 6              | 7               | 8               | 9              |
|--------------------------|----------------------|----------------|-----------------|-----------------|----------------|----------------|----------------|-----------------|-----------------|----------------|
| 1. Job autonomy          | 0.88                 | 6.15<br>(3.04) | -0.01           | -0.23**         | 0.15**         | 0.25**         | 0.33**         | 0.108           | -0.01           | -0.21**        |
| 2. Work-related pressure | 0.90                 |                | 11.71<br>(3.78) | 0.40**          | 0.15**         | 0.20**         | 0.18**         | -0.04           | -0.06           | 0.10*          |
| 3. Emotional exhaustion  | 0.92                 |                |                 | 23.38<br>(1.67) | 0.53**         | 0.57**         | 0.61**         | 0.02            | -0.01           | 0.21**         |
| 4. Depersonalisation     | 0.85                 |                |                 |                 | 5.70<br>(5.74) | 0.40**         | 0.40**         | -0.03           | -0.08           | 0.14**         |
| 5. Anxiety symptoms      | 0.84                 |                |                 |                 |                | 8.53<br>(4.84) | 0.81**         | -0.09*          | -0.04           | 0.16**         |
| 6. Depression symptoms   | 0.91                 |                |                 |                 |                |                | 8.92<br>(5.36) | -0.04           | 0.01            | 0.21**         |
| 7. Tenure                | -                    |                |                 |                 |                |                |                | 11.27<br>(7.29) | 0.87**          | -0.10*         |
| 8. Age                   | -                    |                |                 |                 |                |                |                |                 | 47.63<br>(7.47) | -0.11**        |
| 9. Early Retirement      | -                    |                |                 |                 |                |                |                |                 |                 | 1.58<br>(1.40) |

Note. Mean (SD) are reported diagonally; \*\* $p < .01$  level (2-tailed). \* $p < .05$  level (2-tailed).

### *Direct effects between psychosocial work characteristics and psychological morbidities*

Table 3 presents the results from the three multiple linear regression analyses. Consultants' job autonomy negatively predicted the frequency of their anxiety ( $\beta = -0.10$ ,  $p < .01$ ) and depressive ( $\beta = -0.17$ ,  $p < .01$ ) symptoms, and their early retirement intention ( $\beta = -0.19$ ,  $p < .01$ ). Surprisingly, work-related pressure did not predict any of the three dependent measures.

In terms of the burnout dimensions, emotional exhaustion positively predicted the frequency of consultants' anxiety ( $\beta = .47$ ,  $p < .01$ ) and depressive ( $\beta = .54$ ,  $p < .01$ ) symptoms, and stated intentions to retire early ( $\beta = .13$ ,  $p < .05$ ). Depersonalisation not only had smaller effect sizes than emotional exhaustion, but was only found to predict anxiety ( $\beta = .47$ ,  $p < .01$ ) and depressive ( $\beta = .54$ ,  $p < .01$ ) symptoms. The association between depersonalisation and early retirement intention was not significant.

Table 3: Multiple linear regression analyses – Dependant variables: anxiety symptoms, depressive symptoms and early retirement intention

| Predictors                | Anxiety Symptoms<br>B/ $\beta$ [CI] | Depressive Symptoms<br>B/ $\beta$ [CI] | Early Retirement Intention<br>B/ $\beta$ [CI] |
|---------------------------|-------------------------------------|----------------------------------------|-----------------------------------------------|
| (Constant)                | -0.021                              | -0.84                                  | 2.89                                          |
| Job autonomy              | -0.15** / -0.1<br>[ 0.027, -0.04]   | -0.30** / -.17<br>[-0.42, -0.17]       | -0.09** / -.19<br>[-0.13, -0.05]              |
| Work-related pressure     | -0.03 / .02<br>[-.012, 0.07]        | -0.07 / -.07<br>[-0.17, 0.03]          | 0.01 / .03<br>[-.02, 0.05]                    |
| Emotional exhaustion      | 0.19** / .47<br>[0.16, 0.23]        | 0.25** / .54<br>[0.21, 0.29]           | 0.02* / .13<br>[0.01, 0.03]                   |
| Depersonalisation         | 0.14** / .16<br>[0.07, 0.20]        | 0.11** / .12<br>[0.04, 0.18]           | 0.01 / .02<br>[-0.02, 0.03]                   |
| Specialty                 |                                     |                                        |                                               |
| Pathology or Microbiology | 0.97 / .04<br>[-0.84, 2.78]         | 0.71 / .02<br>[-1.22, 2.64]            | -0.17 / -.02<br>[-0.82, 0.48]                 |
| Surgery                   | -0.75 / -.06<br>[-1.72, 0.22]       | -0.53 / -.04<br>[-1.56, 0.50]          | -0.09 / -.02<br>[0.43, 0.27]                  |
| Anaesthesia               | -0.28 / -.02<br>[-1.34, 0.78]       | 0.28 / .02<br>[-0.85, 1.41]            | -0.13 / -.03<br>[-0.51, 0.25]                 |
| Radiology                 | 0.60 / .03<br>[-0.74, 1.95]         | 0.46 / .02<br>[-0.97, 1.90]            | -0.08 / -.01<br>[-0.56, 0.41]                 |
| Psychiatry                | 0.34 / .02<br>[-0.94, 1.63]         | -0.27 / -.01<br>[-1.64, 1.10]          | 0.27 / .05<br>[-0.19, 0.73]                   |
| Obstetrics/Gynaecology    | -1.64 / -.07<br>[-3.31, 0.03]       | -2.01* / -.08<br>[-3.79, -.22]         | 0.13 / .02<br>[0.48, 0.73]                    |
| Other                     | -0.62 / -0.05<br>[-1.61, 0.37]      | -0.36 / -.02<br>[-1.42, 0.69]          | -0.16 / -.04<br>[-0.52, 0.20]                 |
| Physician (ref)           |                                     |                                        |                                               |
| Age                       | 0.17** / .27<br>[0.08, 0.26]        | 0.18** / .25<br>[0.08, 0.27]           | -0.03 / -.13<br>[-0.06, 0.01]                 |
| Gender (male)             | -1.17** / -.12<br>[-1.87, -0.47]    | -0.02 / .01<br>[-0.77, -0.73]          | -0.12 / -.04<br>[-0.37, 0.14]                 |
| Work experience (years)   | -0.19** / -.29<br>[0.29, -0.10]     | -0.18** / -.25<br>[-0.28, -0.08]       | 0.01 / 0.05<br>[-0.02, 0.04]                  |
| Country                   |                                     |                                        |                                               |
| Wales                     | -0.82* / -.08<br>[-1.59, -0.04]     | -0.69 / -.06<br>[-1.52, 0.14]          | 0.04 / 0.01<br>[-0.24, 0.32]                  |
| England                   | -0.24 / -0.02<br>[-1.03, 0.56]      | -0.01 / .01<br>[-0.86, 0.84]           | -0.14 / -0.04<br>[-0.42, 0.15]                |
| Scotland (ref)            |                                     |                                        |                                               |

Note. \*  $p < .05$ , \*\*  $p < .01$ ; CI: 95% unstandardised confidence intervals.



### *Indirect effects between psychosocial work characteristics and psychological morbidities*

Fewer relationships involving socio-demographic variables were found. High frequency of anxiety symptoms associated with older consultants ( $\beta=.17, p<.01$ ), consultants with less experience ( $\beta=-.19, p<.01$ ) and being male ( $\beta=-.12, p<.01$ ). Surveyed consultants from Wales had more frequent anxiety symptoms than compared to those sampled from Scotland ( $\beta=-.08, p<.05$ ). For depressive symptoms, being older ( $\beta=.18, p<.01$ ) and less experienced ( $\beta=-.18, p<.01$ ) was associated with more frequent depressive symptoms. In terms of speciality, Obstetrics & Gynaecology consultants reported less depressive symptoms ( $\beta=-.08, p<.05$ ) than Physicians. Surveyed consultants' intention to seek early retirement was not associated with any of the socio-demographic variables measured.

Six mediation analyses were carried using Hayes<sup>43</sup> PROCESS macro to examine the mediating role of emotional exhaustion and depersonalisation (Table 4). Within each mediation analysis, socio-demographic variables that were found to predict the dependent variable in the multiple linear regressions above were controlled for. For anxiety symptoms this was gender, age, experience and consultants from Wales; for depressive symptoms age, tenure and Obstetrics & Gynaecology were controlled for.

Table 4: Estimates, standard errors, and confidence interval for indirect effects

| Predictor - Mediator                         | Anxiety symptoms <sup>a</sup> |      |            | Depressive symptoms <sup>b</sup> |      |            | Early retirement intention |      |            |
|----------------------------------------------|-------------------------------|------|------------|----------------------------------|------|------------|----------------------------|------|------------|
|                                              | B                             | SE   | 95% CI     | B                                | SE   | 95% CI     | B                          | SE   | 95% CI     |
| Job autonomy - Emotional exhaustion          | -0.18                         | 0.04 | -.26, -.11 | -0.22                            | 0.04 | -.31, -.14 | 0.02                       | 0.01 | .01, .03   |
| Job autonomy - Depersonalisation             | -0.04                         | 0.02 | -.09, -.02 | -0.03                            | 0.02 | -.08, -.01 | 0.01                       | 0.01 | -.01, .01  |
| Work-related pressure - Emotional exhaustion | 0.25                          | 0.04 | .19, .34   | 0.33                             | 0.04 | .24, .42   | -0.03                      | 0.01 | -.04, -.01 |
| Work-related pressure - Depersonalisation    | 0.03                          | 0.01 | .01, .05   | 0.03                             | 0.01 | .01, .05   | -0.01                      | 0.01 | -.01, .01  |

Note. <sup>a</sup>Controlled for gender, age, experience, and consultants from Wales; <sup>b</sup>Controlled for age, experience, and Obstetrics & Gynaecology consultants.

1  
2  
3 In all six mediation analyses carried out, the direct relationships between the  
4 independent, mediator and dependent measures were consistent with those from the multiple  
5 linear regressions above, as such they are not reported here. In addition to direct effects, a  
6 series of significant indirect effects were observed. Emotional exhaustion was observed to  
7 mediate the relationship between job autonomy and all three outcome measures: anxiety ( $B=-$   
8  $.18$ ,  $SE=.04$ ,  $p<.05$ ) and depressive symptoms ( $B=-.22$ ,  $SE=.04$ ,  $p<.05$ ) and early retirement  
9 intention ( $B=.02$ ,  $SE=.01$ ,  $p<.05$ ). Depersonalisation was observed to partially mediate the  
10 relationship between job autonomy and anxiety ( $B=-.04$ ,  $SE=.02$ ,  $p<.05$ ) and depressive  
11 symptoms ( $B=-.03$ ,  $SE=.02$ ,  $p<.05$ ). Depersonalisation, however, did not mediate the  
12 relationship between job autonomy and intentions for early retirement.  
13  
14  
15  
16  
17  
18  
19  
20  
21  
22  
23  
24

25 The mediation analyses did not observe any direct effects between work-related  
26 pressure and any other three dependent measures— congruent with the multiple linear  
27 regressions. However, evidence of indirect effects among the study variables was observed  
28 via both core burnout dimensions. Emotional exhaustion fully mediated the relationship  
29 between work-related pressure and the frequency of consultants' anxiety ( $B=.25$ ,  $SE=.04$ ,  
30  $p<.05$ ) and depressive symptoms ( $B=.33$ ,  $SE=.04$ ,  $p<.05$ ), and stated intentions for early  
31 retirement ( $B=-.03$ ,  $SE=.01$ ,  $p<.05$ ). Depersonalisation fully mediated the association between  
32 work-related pressures and anxiety ( $B=.03$ ,  $SE=.01$ ,  $p<.05$ ) and depressive ( $B=.03$ ,  $SE=.01$ ,  
33  $p<.05$ ) symptoms. No indirect effect between work-related pressure and early retirement  
34 relationship as mediated by depersonalisation was observed.  
35  
36  
37  
38  
39  
40  
41  
42  
43  
44  
45  
46  
47  
48  
49

## 50 Discussion

51  
52  
53 A large, and growing, research literature has examined the impact of psychosocial  
54 work characteristics in relation to a myriad of work-related wellbeing measures<sup>5,7,8,12</sup>. This  
55  
56  
57  
58  
59  
60

1  
2 hazard–harm relationship is within the general working population strongly evidenced.  
3  
4 However, it is important to understand the nature and driving mechanisms of this hazard-  
5  
6 harm association within its given vocational and organisational contexts<sup>21</sup>. In consideration of  
7  
8 this, the current study examined the nature and underpinning mechanisms of such postulated  
9  
10 associations within a unique, and grossly under researched vocational group: NHS hospital-  
11  
12 based consultants.  
13  
14  
15

16  
17 Approximately 40% of this sample were categorised as ‘high’ on emotional  
18  
19 exhaustion, depressive symptoms and anxiety symptoms. These figures are higher than those  
20  
21 reported by previous studies of NHS consultants<sup>46–49</sup>, and are similar to equivalent surveys of  
22  
23 junior doctors<sup>18,50</sup>. These descriptive findings highlight the importance of considering the  
24  
25 psychological health of doctors (at various stages of their career) as an imperative  
26  
27 occupational health issue that necessitates targeted workplace intervention. This descriptive  
28  
29 finding highlights, we believe, the importance of considering consultants as a particularly at-  
30  
31 risk occupational group in regards to burnout and symptoms of psychological morbidity.  
32  
33

34  
35 The negative impact of poor job autonomy and work-related pressures has been  
36  
37 strongly evidenced in relation to psychological morbidity symptoms and work-related  
38  
39 attitudinal outcomes within the general working population<sup>3,4,9,10</sup>. Like previous findings,  
40  
41 poor job autonomy was found to directly predict the increased frequency of depressive and  
42  
43 anxiety symptoms among surveyed consultants and increased intentions to seek early  
44  
45 retirement. Furthermore, this observed association was partially mediated by reported burnout  
46  
47 symptoms. To our knowledge this is the first study to examine burnout symptoms (i.e.,  
48  
49 emotional exhaustions and depersonalisation) as a potential mediator between psychosocial  
50  
51 work characteristics and psychological morbidity symptoms and work-related attitudinal  
52  
53 outcomes as perceived by NHS consultants. However more broadly, these empirical findings  
54  
55 contribute to a small, albeit growing, research domain within the wider burnout literature. It  
56  
57  
58  
59  
60

1  
2  
3 provides evidence of burnout's contributory role to work-related wellbeing as both an  
4  
5 outcome, but also an intervening variable. We would speculate that the nature of this  
6  
7 association would also, by extension, be predicative of work-related behaviours (e.g., leaving  
8  
9 the profession) and performance among medical professionals. However, this speculation  
10  
11 remains untested but remains an important avenue for future research.  
12  
13

14 In contrast to the existing literature<sup>3,4</sup>, work-related pressure did not have a direct  
15  
16 association with surveyed consultants' reported symptoms of psychological morbidities and  
17  
18 intentions to seek early retirement. However, surveyed consultants' reported symptoms of  
19  
20 emotional exhaustion and depersonalisation were both observed to fully mediate the  
21  
22 relationship between their perceived work-related pressures and reported psychological  
23  
24 morbidities. It is important to highlight that the findings derived from the mediation analysis  
25  
26 are based on cross-sectional data. However, it does suggest that while excessive and chronic  
27  
28 work-related pressures may not be directly associated with surveyed consultants'  
29  
30 psychological health, instead it appears that the experience of burnout may play an important  
31  
32 role facilitating its detrimental impact. However, such postulations of directionality and  
33  
34 causality require further systematic longitudinal investigation.  
35  
36  
37

38 Despite the mediating role of the burnout dimensions, depersonalisation did not  
39  
40 operate as a mediator where early retirement intention was an outcome. This is perhaps not  
41  
42 surprising, as depersonalisation is defined as withdrawal from fully engaging with their  
43  
44 current role<sup>21</sup>. Therefore, it may be that some consultants who cope at work by  
45  
46 depersonalising may be less inclined to see early retirement as a method to leave their work  
47  
48 environment. Nevertheless, the relationship that depersonalisation has with both depressive  
49  
50 and anxiety symptoms suggests that this is not a healthy coping mechanism.  
51  
52  
53

#### 54 *Practical implications*

55  
56  
57  
58  
59  
60

1  
2  
3 Our findings highlight the value of workplace health interventions targeted at  
4 adapting working conditions and proactively managing burnout among the NHS staff. One  
5 approach to improve the psychosocial work environment is job crafting which has been found  
6 to improve medical specialists' wellbeing and performance<sup>51</sup>. Socio-demographic variables  
7 had some relationship with consultants' psychological morbidity symptoms, which warrants  
8 further exploration in future research. Nevertheless, psychosocial work characteristics remain  
9 better predictors of the study outcomes used. Consequently, comprehensive interventions that  
10 simultaneously targeting organisational, material and work-time related conditions may be  
11 more beneficial to worker health, than interventions only targeting the individual<sup>38</sup>.  
12 Government and healthcare leaders need to consider how future organisational decisions in  
13 the NHS may further impact on consultants' psychosocial work characteristics and, in turn,  
14 their work-related wellbeing. Although the NHS is under increasing demands and financial  
15 strain, greater dialogue between consultants, hospital managers and government officials, at  
16 both the local and national level, will go some way in influencing how work-related pressure  
17 and job autonomy are perceived and managed<sup>34,35</sup>.

### 35 36 *Conclusion*

37  
38 The findings from the current study contribute to the small, but growing research area,  
39 namely: the examination of NHS's consultants' work-related wellbeing and the contributing  
40 role of their psychosocial working environment. Another important empirical contribution of  
41 this study is the observed evidence of experienced burnout symptoms mediating (either  
42 partially or fully) the observed relationship between job autonomy and work-related pressures  
43 in relation to surveyed consultants' psychological morbidity symptoms. This highlights the  
44 salient role of burnout as an intervening variable, and is especially concerning given the high  
45 prevalence of consultants scoring as 'high' on the burnout and psychological morbidity  
46 symptom measures. These findings emphasise the importance of preventing and mitigating  
47  
48  
49  
50  
51  
52  
53  
54  
55  
56  
57  
58  
59  
60

1  
2  
3 burnout, and the cultivation of skill discretion and autonomy among consultants as an  
4 important organisationally-focused preventive strategy. This is important, not only for the  
5 NHS' ability to provide safe and high quality care<sup>30,52</sup>; but also to maintain and retain a  
6 healthy and productive workforce<sup>29</sup>.  
7  
8  
9  
10  
11  
12  
13  
14  
15  
16  
17  
18  
19  
20  
21  
22  
23  
24  
25  
26  
27  
28  
29  
30  
31  
32  
33  
34  
35  
36  
37  
38  
39  
40  
41  
42  
43  
44  
45  
46  
47  
48  
49  
50  
51  
52  
53  
54  
55  
56  
57  
58  
59  
60

## Other Information

### *Funding*

Research & Development department, Hywel Dda University Health Board.

### *Contributors*

AK and JH conceived the study concept and design. AK and KT drafted the first version of the manuscript. KT and JH provided critical revision of the manuscript as it went through the revision process. SI and KT did the data management and statistical analyses. All authors contributed to the content and critical revision of the report, and agreed to submit the report for publication.

### *Declaration of interests*

We have no competing interests to declare.

### *Acknowledgements*

We would like to thank all those who helped to collect the data. Professor Steve Bain, University of Swansea, was instrumental in making it easier to collect the data from Welsh Health Boards. Professor Graham Leese, University of Dundee, helped to create connections in Scotland to collect data from various hospitals. Consultant colleagues not only completed the questionnaire, they also provided positive feedback to ASAK. We are grateful to all human resource officers for helping ASAK to circulate the questionnaire web-link in respective hospitals.

## References

1. NHS Choices. About the National Health Service (NHS). The NHS in England. [www.nhs.uk/NHSEngland/thenhs/about/Pages/overview.aspx](http://www.nhs.uk/NHSEngland/thenhs/about/Pages/overview.aspx). Accessed January 8, 2015.
2. Chartered Institute for Personnel Development. *Absence Management: Annual Survey Report 2013*. London, UK: CIPD; 2013.
3. Bonde JPE. Psychosocial factors at work and risk of depression: A systematic review of the epidemiological evidence. *Occup Environ Med*. 2008;65(7):438-445. doi:10.1136/oem.2007.038430.
4. Stansfeld SA, Candy B. Psychosocial work environment and mental health- A meta-analytic review. *Scand J Work Environ Heal*. 2006;32(6):443-462. doi:10.5271/sjweh.1050.
5. Kouvonen A, Kivimäki M, Virtanen M, Pentti J, Vahtera J. Work stress, smoking status, and smoking intensity: An observational study of 46 190 employees. *J Epidemiol Community Health*. 2005;59(1):63-69. doi:10.1136/jech.2004.019752.
6. Kouvonen A, Kivimäki M, Elovainio M, et al. Low organisational justice and heavy drinking: a prospective cohort study. *Occup Environ Med*. 2008;65(1):44-50. doi:10.1136/oem.2007.032755.
7. Kivimäki M, Virtanen M, Elovainio M, Kouvonen A, Väänänen A, Vahtera J. Work stress in the etiology of coronary heart disease—A meta-analysis. *Scand J Work Environ Heal*. 2006;32(6):431-442. doi:10.5271/sjweh.1049.
8. Kuper H, Marmot MG. Job strain, job demands, decision latitude, and risk of coronary heart disease within the Whitehall II study. *J Epidemiol Community Health*. 2003;57(2):147-153. doi:10.1136/jech.57.2.147.
9. Faragher EB, Cass M, Cooper CL. The relationship between job satisfaction and health: A meta-analysis. *Occup Environ Med*. 2005;62(2):105-112. doi:10.1136/oem.2002.006734.
10. Wu T-Y, Fox DP, Stokes C, Adam C. Work-related stress and intention to quit in newly graduated nurses. *Nurse Educ Today*. 2012;32(6):669-674. doi:10.1016/j.nedt.2011.09.002.



- 1  
2  
3 11. Mathieu JE, Zajac DM. A review and meta-analysis of the antecedents, correlates, and  
4 consequences of organizational commitment. *Psychol Bull.* 1990;108(2):171-194.  
5 doi:10.1037/0033-2909.108.2.171.  
6  
7
- 8 12. Leka S, Jain A. *Health Impact of Psychosocial Hazards at Work: An Overview.*  
9 Geneva, Switzerland: WHO Press; 2010.  
10 [http://apps.who.int/iris/bitstream/10665/44428/1/9789241500272\\_eng.pdf](http://apps.who.int/iris/bitstream/10665/44428/1/9789241500272_eng.pdf).  
11  
12
- 13 13. Adriaenssens J, De Gucht V, Maes S. Determinants and prevalence of burnout in  
14 emergency nurses: A systematic review of 25 years of research. *Int J Nurs Stud.*  
15 2015;52(2):649-661. doi:10.1016/j.ijnurstu.2014.11.004.  
16  
17
- 18 14. Cummings GG, MacGregor T, Davey M, et al. Leadership styles and outcome patterns  
19 for the nursing workforce and work environment: a systematic review. *Int J Nurs Stud.*  
20 2010;47(3):363-385. doi:10.1016/j.ijnurstu.2009.08.006.  
21  
22
- 23 15. McFadden P, Campbell A, Taylor B. Resilience and burnout in child protection social  
24 work: Individual and organisational themes from a systematic literature review. *Br J*  
25 *Soc Work.* 2015;45(5):1546-1563. doi:10.1093/bjsw/bct210.  
26  
27
- 28 16. Lloyd C, King R, Chenoweth L. Social work, stress and burnout: A review. *J Ment*  
29 *Heal.* 2002;11(3):255-265.  
30  
31
- 32 17. Lee RT, Seo B, Hladkyj S, Lovell BL, Schwartzmann L. Correlates of physician  
33 burnout across regions and specialties: A meta-analysis. *Hum Resour Health.*  
34 2013;11(1):48. doi:10.1186/1478-4491-11-48.  
35  
36
- 37 18. Prins JT, Gazendam-Donofrio SM, Tubben BJ, van der Heijden FMMA, van de Wiel  
38 HBM, Hoekstra-Weebers JEHM. Burnout in medical residents: A review. *Med Educ.*  
39 2007;41(8):788-800. doi:10.1111/j.1365-2923.2007.02797.x.  
40  
41
- 42 19. Academy of Medical Royal Colleges. *The Benefits of Consultant Delivered Care.*  
43 London, UK; 2012.  
44  
45
- 46 20. Peadon E, Caldwell PH, Oldmeadow W. "I enjoy teaching but...": Paediatricians'  
47 attitudes to teaching medical students and junior doctors. *J Paediatr Child Health.*  
48 2010;46(11):647-652. doi:10.1111/j.1440-1754.2010.01823.x.  
49  
50
- 51 21. Schaufeli WB. Burnout in health care. In: Carayon P, ed. *Handbook of Human Factors*  
52 *and Ergonomics in Health Care and Patient Safety.* New York, NY: CRC Press;  
53  
54  
55  
56  
57  
58  
59

- 2007:217-232.
22. Maslach C, Jackson SE. *The Maslach Burnout Inventory Manual*. 2nd ed. Palo Alto, CA: Consulting Psychologists Press; 1986.
23. Maslach C, Schaufeli WB, Leiter MP. Job burnout. *Annu Rev Psychol*. 2001;52(1):397-422. doi:10.1146/annurev.psych.52.1.397.
24. Schaufeli WB, Taris TW. The conceptualization and measurement of burnout: Common ground and worlds apart. *Work Stress*. 2005;19(3):256-262. doi:10.1080/02678370500385913.
25. Demerouti E, Bakker AB, Nachreiner F, Schaufeli WB. The job demands-resources model of burnout. *J Appl Psychol*. 2001;86(3):499-512. doi:10.1108/02683940710733115.
26. Hakanen JJ, Schaufeli WB, Ahola K. The Job Demands-Resources model: A three-year cross-lagged study of burnout, depression, commitment, and work engagement. *Work Stress*. 2008;22(3):224-241. doi:10.1080/02678370802379432.
27. Lheureux F, Truchot D, Borteyrou X. Suicidal tendency, physical health problems and addictive behaviours among general practitioners: Their relationship with burnout. *Work Stress*. 2016;30(2):173-192. doi:10.1080/02678373.2016.1171806.
28. Taris TW. Is there a relationship between burnout and objective performance? A critical review of 16 studies. *Work Stress*. 2006;20(4):316-334. doi:10.1080/02678370601065893.
29. Tziner A, Rabenu E, Radomski R, Belkin A. Work stress and turnover intentions among hospital physicians: The mediating role of burnout and work satisfaction. *Rev Psicol del Trab y las Organ*. 2015;31(3):207-213. doi:10.1016/j.rpto.2015.05.001.
30. Dewa CS, Loong D, Bonato S, Trojanowski L. The relationship between physician burnout and quality of healthcare in terms of safety and acceptability: A systematic review. *BMJ Open*. 2017;7(6):e015141. doi:10.1136/bmjopen-2016-015141.
31. Hobfoll SE, Freedy J. Conservation of Resources: A general stress theory applied to burnout. In: Schaufeli WB, Maslach C, Marek T, eds. *Professional Burnout: Recent Developments in Theory and Research*. Philadelphia, PA: Taylor & Francis; 1993:115-133. doi:10.1680/udap.2010.163.

- 1  
2  
3 32. Toker S, Biron M. Job burnout and depression: Unraveling their temporal relationship  
4 and considering the role of physical activity. *J Appl Psychol.* 2012;97(3):699-710.  
5 doi:10.1037/a0026914.  
6  
7  
8 33. Smith F, Lachish S, Goldacre MJ, Lambert TW. Factors influencing the decisions of  
9 senior UK doctors to retire or remain in medicine: National surveys of the UK-trained  
10 medical graduates of 1974 and 1977. *BMJ Open.* 2017;7(9):e017650.  
11 doi:10.1136/bmjopen-2017-017650.  
12  
13 34. Walker A, Awad Z, Tolley N, Narula A, Bradley P. Non-clinical demands are pushing  
14 experienced UK surgeons out of the NHS. *Int J Healthc Manag.* 2016;9(3):163-168.  
15 doi:10.1080/20479700.2015.1125081.  
16  
17 35. Martin G, Sieber S, Howieson B, Bushfield S. *The Changing Experience of Work of*  
18 *Consultants in NHS Scotland.*; 2015.  
19  
20 36. Bakker AB. *The Job Demands–Resources Questionnaire.* Rotterdam, the Netherlands;  
21 2014.  
22  
23 37. Mata DA, Ramos MA, Bansal N, et al. Prevalence of depression and depressive  
24 symptoms among resident physicians. *JAMA.* 2015;314(22):2373–2383.  
25 doi:10.1001/jama.2015.15845.  
26  
27 38. Montano D, Hoven H, Siegrist J. Effects of organisational-level interventions at work  
28 on employees' health: a systematic review. *BMC Public Health.* 2014;14(1):135.  
29 doi:10.1186/1471-2458-14-135.  
30  
31 39. Spielberger CD. *State-Trait Personality Inventory (STPI) Research Manual.* Mind  
32 Garden Inc; 1995.  
33  
34 40. Giesecke T, Williams DA, Harris RE, et al. Subgrouping of fibromyalgia patients on  
35 the basis of pressure-pain thresholds and psychological factors. *Arthritis Rheum.*  
36 2003;48(10):2916-2922. doi:10.1002/art.11272.  
37  
38 41. Julian LJ. Measures of anxiety: State-Trait Anxiety Inventory (STAI), Beck Anxiety  
39 Inventory (BAI), and Hospital Anxiety and Depression Scale-Anxiety (HADS-A).  
40 *Arthritis Care Res (Hoboken).* 2011;63(S11):S467-S472. doi:10.1002/acr.20561.  
41  
42 42. Eurofound. *Sixth European Working Conditions Survey – Overview Report.*  
43 Luxembourg: Publications Office of the European Union; 2016.  
44  
45  
46  
47  
48  
49  
50  
51  
52  
53  
54  
55  
56  
57  
58  
59  
60

- 1  
2  
3 <http://www.eurofound.europa.eu/european-working-conditions-surveys-ewcs>.
- 4  
5 43. Hayes AF. *Introduction to Mediation, Moderation, and Conditional Process Analysis*.  
6 New York, NY: Guildford Press; 2013. doi:978-1-60918-230-4.
- 7  
8  
9 44. Shrout PE, Bolger N. Mediation in experimental and nonexperimental studies: New  
10 procedures and recommendations. *Psychol Methods*. 2002;7(4):422-445.  
11 doi:10.1037//1082-989x.7.4.422.
- 12  
13  
14 45. von Elm E, Altman DG, Egger M, Pocock SJ, Gotsche PC, Vandembroucke JP.  
15 Strengthening the reporting of observational studies in epidemiology (STROBE)  
16 statement: guidelines for reporting observational studies. *BMJ*. 2007;335(7624):806-  
17 808. doi:10.1136/bmj.39335.541782.AD.
- 18  
19  
20  
21 46. Coomber S. Stress in UK intensive care unit doctors. *Br J Anaesth*. 2002;89(6):873-  
22 881. doi:10.1093/bja/aef273.
- 23  
24  
25 47. Burbeck R. Occupational stress in consultants in accident and emergency medicine: a  
26 national survey of levels of stress at work. *Emerg Med J*. 2002;19(3):234-238.  
27 doi:10.1136/emj.19.3.234.
- 28  
29  
30  
31 48. Taylor C, Graham J, Potts HWW, Richards MA, Ramirez AJ. Changes in mental  
32 health of UK hospital consultants since the mid-1990s. *Lancet*. 2005;366(9487):742-  
33 744. doi:10.1016/S0140-6736(05)67178-4.
- 34  
35  
36 49. Ramirez AJ, Graham J, Richards MA, Cull A, Gregory WM. Mental health of hospital  
37 consultants: The effects of stress and satisfaction at work. *Lancet*.  
38 1996;347(9003):724-728. doi:10.1016/S0140-6736(96)90077-X.
- 39  
40  
41  
42 50. Toral-Villanueva R, Aguilar-Madrid G, Juárez-Pérez CA. Burnout and patient care in  
43 junior doctors in Mexico City. *Occup Med (Chic Ill)*. 2009;59(1):8-13.  
44 doi:10.1093/occmed/kqn122.
- 45  
46  
47 51. Gordon HJ, Demerouti E, Le Blanc PM, Bakker AB, Bipp T, Verhagen MAMT.  
48 Individual job redesign: Job crafting interventions in healthcare. *J Vocat Behav*. July  
49 2017. doi:10.1016/j.jvb.2017.07.002.
- 50  
51  
52  
53 52. Hall LH, Johnson J, Watt I, Tsipa A, O'Connor DB. Healthcare staff wellbeing,  
54 burnout, and patient safety: A systematic review. *PLoS One*. 2016;11(7):1-12.  
55 doi:10.1371/journal.pone.0159015.
- 56  
57  
58  
59

1  
2  
3 **Figure 1.** Postulated direct and indirect effects of job autonomy and work-related pressures  
4  
5  
6  
7  
8  
9  
10  
11  
12  
13  
14  
15  
16  
17  
18  
19  
20  
21  
22  
23  
24  
25  
26  
27  
28  
29  
30  
31  
32  
33  
34  
35  
36  
37  
38  
39  
40  
41  
42  
43  
44  
45  
46  
47  
48  
49  
50  
51  
52  
53  
54  
55  
56  
57  
58  
59  
60

For peer review only

1  
2  
3  
4  
5  
6  
7  
8  
9  
10  
11  
12  
13  
14  
15  
16  
17  
18  
19  
20  
21  
22  
23  
24  
25  
26  
27  
28  
29  
30  
31  
32  
33  
34  
35  
36  
37  
38  
39  
40  
41  
42  
43  
44  
45  
46  
47  
48  
49  
50  
51  
52  
53  
54  
55  
56  
57  
58  
59  
60

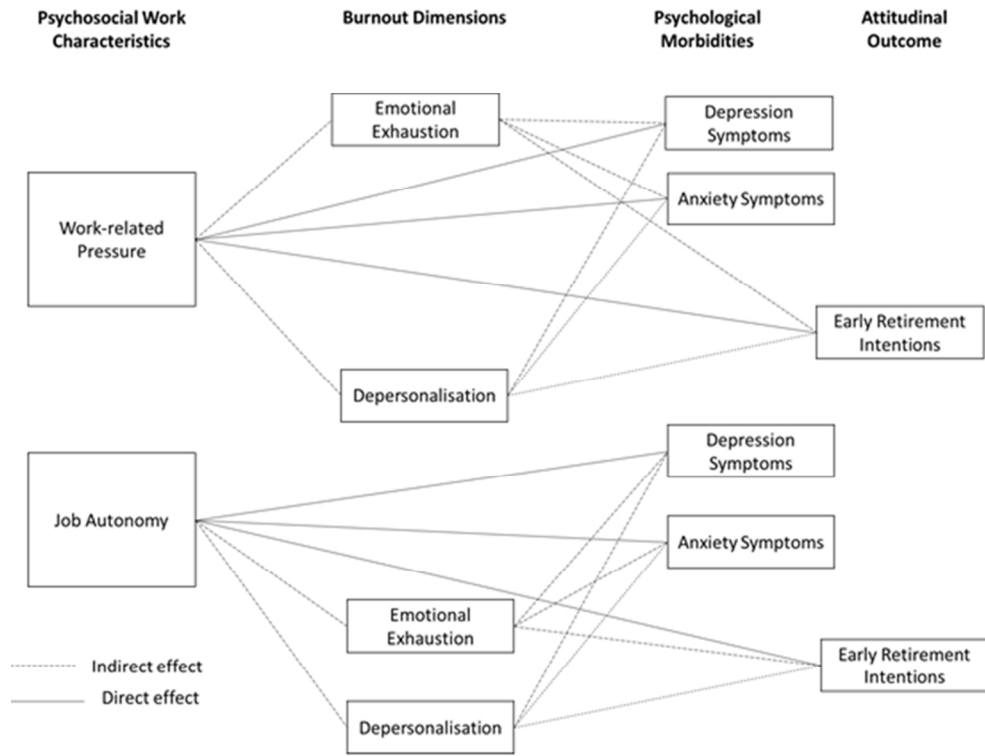

Figure 1. Postulated direct and indirect effects of job autonomy and work-related pressures

83x63mm (300 x 300 DPI)

**STROBE Checklist for Psychosocial Work Characteristics, Burnout, Psychological Morbidity Symptoms and Early Retirement Intentions: A Cross-sectional Study of NHS Consultants in the United Kingdom.**

STROBE Statement—Checklist of items that should be included in reports of *cross-sectional studies*

|                           | Item No | Recommendation                                                                                                                                                                       | Location                                              |
|---------------------------|---------|--------------------------------------------------------------------------------------------------------------------------------------------------------------------------------------|-------------------------------------------------------|
| <b>Title and abstract</b> | 1       | (a) Indicate the study's design with a commonly used term in the title or the abstract                                                                                               | In title the term "cross-sectional" is included       |
|                           |         | (b) Provide in the abstract an informative and balanced summary of what was done and what was found                                                                                  | Abstract based on the journal's structure is included |
| <b>Introduction</b>       |         |                                                                                                                                                                                      |                                                       |
| Background/rationale      | 2       | Explain the scientific background and rationale for the investigation being reported                                                                                                 | Pg. 1 of the manuscript, paragraph 1.                 |
| Objectives                | 3       | State specific objectives, including any prespecified hypotheses                                                                                                                     | Pg. 6 under "Study Aims"                              |
| <b>Methods</b>            |         |                                                                                                                                                                                      |                                                       |
| Study design              | 4       | Present key elements of study design early in the paper                                                                                                                              | Pg. 7 under "study design and sample"                 |
| Setting                   | 5       | Describe the setting, locations, and relevant dates, including periods of recruitment, exposure, follow-up, and data collection                                                      | Pg. 7 under "study design and sample"                 |
| Participants              | 6       | (a) Give the eligibility criteria, and the sources and methods of selection of participants                                                                                          | Pg. 7 under "study design and sample"                 |
| Variables                 | 7       | Clearly define all outcomes, exposures, predictors, potential confounders, and effect modifiers. Give diagnostic criteria, if applicable                                             | Variables are introduced in the Introduction          |
| Data sources/ measurement | 8*      | For each variable of interest, give sources of data and details of methods of assessment (measurement). Describe comparability of assessment methods if there is more than one group | Pg. 8 under "Measures"                                |
| Bias                      | 9       | Describe any efforts to address potential sources of bias                                                                                                                            |                                                       |
| Study size                | 10      | Explain how the study size was arrived at                                                                                                                                            | Pg. 7 under "study design and sample"                 |
| Quantitative variables    | 11      | Explain how quantitative variables were handled in the analyses. If applicable, describe which groupings were chosen and why                                                         | Pg 9 under "Statistical analysis"                     |
| Statistical methods       | 12      | (a) Describe all statistical methods, including those used to control for confounding                                                                                                | Pg 9 under "Statistical analysis"                     |
|                           |         | (b) Describe any methods used to examine subgroups and interactions                                                                                                                  | Not applicable                                        |

|                          |     |                                                                                                                                                                                                              |                                       |
|--------------------------|-----|--------------------------------------------------------------------------------------------------------------------------------------------------------------------------------------------------------------|---------------------------------------|
|                          |     | (c) Explain how missing data were addressed                                                                                                                                                                  | Pg. 7 under “study design and sample” |
|                          |     | (d) If applicable, describe analytical methods taking account of sampling strategy                                                                                                                           | Pg 9 under “Statistical analysis”     |
|                          |     | (e) Describe any sensitivity analyses                                                                                                                                                                        | Not applicable                        |
| <b>Results</b>           |     |                                                                                                                                                                                                              |                                       |
| Participants             | 13* | (a) Report numbers of individuals at each stage of study—eg numbers potentially eligible, examined for eligibility, confirmed eligible, included in the study, completing follow-up, and analysed            | Pg. 7 under “study design and sample” |
|                          |     | (b) Give reasons for non-participation at each stage                                                                                                                                                         | Not applicable                        |
|                          |     | (c) Consider use of a flow diagram                                                                                                                                                                           | Not applicable                        |
| Descriptive data         | 14* | (a) Give characteristics of study participants (eg demographic, clinical, social) and information on exposures and potential confounders                                                                     | Table 1                               |
|                          |     | (b) Indicate number of participants with missing data for each variable of interest                                                                                                                          | Table 1                               |
| Outcome data             | 15* | Report numbers of outcome events or summary measures                                                                                                                                                         | Table 2                               |
| Main results             | 16  | (a) Give unadjusted estimates and, if applicable, confounder-adjusted estimates and their precision (eg, 95% confidence interval). Make clear which confounders were adjusted for and why they were included | Tables 2-4                            |
|                          |     | (b) Report category boundaries when continuous variables were categorized                                                                                                                                    | Not applicable                        |
|                          |     | (c) If relevant, consider translating estimates of relative risk into absolute risk for a meaningful time period                                                                                             | Not applicable                        |
| Other analyses           | 17  | Report other analyses done—eg analyses of subgroups and interactions, and sensitivity analyses                                                                                                               | Tables 2-4                            |
| <b>Discussion</b>        |     |                                                                                                                                                                                                              |                                       |
| Key results              | 18  | Summarise key results with reference to study objectives                                                                                                                                                     | Pg. 16, first paragraph of discussion |
| Limitations              | 19  | Discuss limitations of the study, taking into account sources of potential bias or imprecision. Discuss both direction and magnitude of any potential bias                                                   | Embedded in the Discussion section    |
| Interpretation           | 20  | Give a cautious overall interpretation of results considering objectives, limitations, multiplicity of analyses, results from similar studies, and other relevant evidence                                   | Discussion section                    |
| Generalisability         | 21  | Discuss the generalisability (external validity) of the study results                                                                                                                                        | Discussion section                    |
| <b>Other information</b> |     |                                                                                                                                                                                                              |                                       |
| Funding                  | 22  | Give the source of funding and the role of the funders for the present study and, if applicable, for                                                                                                         | Not applicable                        |



---

the original study on which the present article is based

---

\*Give information separately for exposed and unexposed groups.

**Note:** An Explanation and Elaboration article discusses each checklist item and gives methodological background and published examples of transparent reporting. The STROBE checklist is best used in conjunction with this article (freely available on the Web sites of PLoS Medicine at <http://www.plosmedicine.org/>, Annals of Internal Medicine at <http://www.annals.org/>, and Epidemiology at <http://www.epidem.com/>). Information on the STROBE Initiative is available at [www.strobe-statement.org](http://www.strobe-statement.org).

# BMJ Open

## Psychosocial Work Characteristics, Burnout, Psychological Morbidity Symptoms and Early Retirement Intentions: A Cross-sectional Study of NHS Consultants in the United Kingdom.

|                                 |                                                                                                                                                                                                                                                                                                                                                 |
|---------------------------------|-------------------------------------------------------------------------------------------------------------------------------------------------------------------------------------------------------------------------------------------------------------------------------------------------------------------------------------------------|
| Journal:                        | <i>BMJ Open</i>                                                                                                                                                                                                                                                                                                                                 |
| Manuscript ID                   | bmjopen-2017-018720.R2                                                                                                                                                                                                                                                                                                                          |
| Article Type:                   | Research                                                                                                                                                                                                                                                                                                                                        |
| Date Submitted by the Author:   | 09-May-2018                                                                                                                                                                                                                                                                                                                                     |
| Complete List of Authors:       | Khan, Atir; Medicine<br>Teoh, Kevin; Birkbeck University of London, Department of Organizational Psychology<br>Islam, Saiful; Swansea University, College of Medicine<br>Hassard, Juliet; University of Nottingham, Centre for Organisational Health and Development, Institute of Mental Health, Division of Psychiatry and Applied Psychology |
| <b>Primary Subject Heading</b>: | Health services research                                                                                                                                                                                                                                                                                                                        |
| Secondary Subject Heading:      | Health policy, Medical management                                                                                                                                                                                                                                                                                                               |
| Keywords:                       | Psychological Morbidity, Autonomy, burnout, working conditions, Retirement Intentions                                                                                                                                                                                                                                                           |
|                                 |                                                                                                                                                                                                                                                                                                                                                 |

SCHOLARONE™  
Manuscripts

# Psychosocial Work Characteristics, Burnout, Psychological Morbidity Symptoms and Early Retirement Intentions: A Cross-sectional Study of NHS Consultants in the United Kingdom.

Atir Khan<sup>1</sup>, Kevin Teoh<sup>2</sup>, Saiful Islam<sup>3</sup>, Juliet Hassard<sup>4</sup>.

<sup>1</sup>Consultant Physician Diabetes & Endocrinology, Diabetes Centre, Glangwili Hospital, Hywel Dda University Health Board, Carmarthen, SA31 2AF, U.K.

<sup>2</sup>Lecturer, Department of Organizational Psychology, Birkbeck University of London, London, WC1E 7HX, U.K.

<sup>3</sup>Statistician, Swansea Trials Unit, College of Medicine, Swansea University, Swansea, SA2 8PP, U.K.

<sup>4</sup> Assistant Professor in Occupational Health Psychology, Centre for Organisational Health and Development, Institute of Mental Health, Division of Psychiatry and Applied Psychology, University of Nottingham, Nottingham, NG7 2TU, U.K.

## Corresponding Author

Dr Atir Sultan Ali Khan, Diabetes Centre, Glangwili Hospital, Hywel Dda University Health Board, Carmarthen, SA31 2AF, U.K.

[atir.khan45@gmail.com](mailto:atir.khan45@gmail.com)

Tel: +44-1267-227-869

Funding: This study was funded by a study grant from the Research & Development Department Hywel Dda University Health Board

## Data Sharing Statement

Individual participant data collected under this study were deidentified which are reported in the form of tables. The original proposal of the study will be available upon request. Deidentified data will be shared for non-commercial research purpose given the consent of the lead author after the publications as per guidelines of the BMJ Open.

**Licence To Publish Statement** "I, Dr Atir Sultan Ali Khan, the Corresponding Author of this article contained within the original manuscript which includes any diagrams & photographs within and any related or stand-alone film submitted (the Contribution)" has the right to grant on behalf of all authors and does grant on behalf of all authors, a licence to the BMJ Publishing Group Ltd and its licensees, to permit this Contribution (if accepted) to be published in the BMJ and any other BMJ Group products and to exploit all subsidiary rights, as set out in our licence set out at: <http://www.bmj.com/about-bmj/resources-authors/forms-policies-and-checklists/copyright-open-access-and-permission-reuse>."

**Transparency Declaration** Lead author (Dr Atir Khan) affirms that the manuscript is an honest, accurate, and transparent account of the study being reported; that no important aspects of the study have been omitted; and that any discrepancies from the study as planned (and, if relevant, registered) have been explained.

## Abstract

**OBJECTIVES** The objectives of this study are twofold. First, to examine the direct effect of psychosocial work characteristics (as measured by job autonomy and work-related pressure) in relation to self-reported psychological morbidity symptoms and early retirement intentions among a sample of hospital consultants in the National Health Service (NHS). Second, to investigate burnout as mediating variable (i.e., indirect effect) of these postulated associations.

**DESIGN** A cross-sectional observational study.

**PARTICIPANTS** 593 NHS consultants (Male = 63.1%) from hospitals in England, Scotland and Wales.

**MEASURES** Self-reported online questionnaires on work-related pressure and job autonomy (Job Demands-Resources Questionnaire); emotional exhaustion and depersonalisation (Maslach Burnout Inventory); depressive and anxiety symptoms (State Trait Personality Inventory); and a single-item on early retirement intention.

**RESULTS** This study observed high prevalence rates across all adverse health measures: emotional exhaustion (38.7%), depersonalisation (20.7%), anxiety symptoms (43.1%), and depressive symptoms (36.1%). Multiple linear regressions examined the postulated direct and indirect effects. Job autonomy had significant negative direct effects on the frequency of NHS consultants' anxiety and depressive symptoms, and their intention to retire early. Both emotional exhaustion and depersonalisation mediated the relationships that work-related pressure (full mediation) and job autonomy (partial mediation) had with self-reported symptoms of psychological morbidities. Only emotional exhaustion mediated the relationships where early retirement intention was the outcome. In terms of socio-demographic factors, age and years' experience predicted both burnout dimensions and psychological morbidity.

**CONCLUSIONS** This is the first study to observe job autonomy to be associated with the number of self-reported psychological morbidity symptoms and early retirement intentions in a sample of NHS consultants. Burnout dimensions mediated these relationships, indicating that interventions need to focus on enhancing working conditions and addressing burnout among NHS consultants before more severe symptoms of psychological morbidity are reported. This study has implications for NHS policy makers and senior leadership.

## STRENGTHS AND LIMITATIONS OF THIS STUDY

- This is the first study to demonstrate the mediating role of burnout between psychosocial work characteristics of NHS consultants and their reported depressive and anxiety symptoms and intentions to seek early retirement.
- Mediations were examined using Hayes' PROCESS Model 4 macro with bootstrapping, which generates more accurate confidence intervals than other more commonly used mediation methods.
- This is a cross-sectional study design. As such, any interpretation of causality is not appropriate, as it is plausible that the relationship between the variables measured are reciprocal in nature.
- All study variables were drawn from self-report data of the individual consultant, making it vulnerable to common method bias.
- We were not able determine the response rate as we are unaware as to how many NHS trusts and health boards who agreed to participate actually followed through and sent the survey link to their consultants.

## Introduction

The National Health Service (NHS) is one of the world's largest employers, with 1.3 million staff in England and Wales caring for an estimated 243 million patients annually<sup>1</sup>. For this system to continue to provide safe, sustainable and patient-centred care the wellbeing and retention of its workforce are critical considerations. The NHS performs comparatively worse across many measures of staff wellbeing; with sickness absence rates, on average, 27% higher than the UK public sector and 46% higher across all sectors<sup>2</sup>. Understanding the nature and impact of psychosocial working conditions on medical professionals' work-related wellbeing is, we believe, of clear empirical importance. In addition, its practical value in the development of evidenced-based workplace preventative solutions cannot be understated.

### *Psychosocial work characteristics and work-related wellbeing*

Exposure to poor psychosocial work characteristics (e.g., poor job autonomy, work-related pressures, injustice at work, insufficient leadership) have been linked to a myriad of work-related wellbeing (inclusive of physical, psychological, behavioural and attitudinal) outcomes, including for example: poor mental health<sup>3,4</sup>; increased health impairing behaviours (e.g., increased smoking<sup>5</sup>, alcohol consumption<sup>6</sup>); poor physical health (e.g., coronary heart disease<sup>7,8</sup>; reduced job satisfaction<sup>9</sup>; intention to quit<sup>10</sup>; and diminished organisational commitment<sup>11</sup>). In short, there is strong research to suggest that exposure to poor psychosocial work characteristics poses a clear risk to employees' health and work engagement. However, the nature and mechanisms underpinning such associations must be examined and understood at various levels (e.g., community, sectoral, and organisational), and within various vocational groups and occupational roles<sup>12</sup>.

Within the healthcare sector, much of the available research has focused on a limited number of occupational groups (e.g., nurses<sup>13,14</sup>; social workers<sup>15,16</sup>; and, to a lesser degree,

1  
2  
3 doctors<sup>17,18</sup>). The importance of focusing on different occupational groups is evident in a  
4  
5 study of German intensive care units, where nurses, junior physicians and senior physicians  
6  
7 reported different levels of burnout, turnover intention and perceived nonbeneficial patient  
8  
9 treatment<sup>19</sup>. While the extant literature examining doctors specifically is increasing, there has  
10  
11 (to date) been little attempt to examine the nature of this association within a unique  
12  
13 vocational subgroup: NHS hospital consultants. These doctors are among the most  
14  
15 experienced and trained within this vocational group<sup>20</sup>. Their role as educators and  
16  
17 supervisors of the next generation of doctors and nurses means their organisational  
18  
19 contribution in the development of the current and future healthcare workforce is  
20  
21 imperative<sup>21</sup>.

### 22 23 24 25 *The Mediating Role of Burnout*

26  
27  
28 Burnout is one of the most commonly studied wellbeing constructs within the  
29  
30 healthcare sector<sup>22</sup>; and, in particular, as a measure of work-related wellbeing among doctors.  
31  
32 Burnout refers to a prolonged psychological response to chronic emotional and interpersonal  
33  
34 stresses related to work<sup>23,24</sup>, and manifests through symptoms of emotional exhaustion,  
35  
36 depersonalisation and reduced personal accomplishment. *Emotional exhaustion* denotes being  
37  
38 emotionally overextended and exhausted by work. *Depersonalisation* refers to an impersonal  
39  
40 feeling towards people, and reduced *personal accomplishment* encompasses the reduced  
41  
42 work effectiveness due to emotional exhaustion and depersonalisation. Studies<sup>22,25,26</sup> have  
43  
44 found strong and consistent support for the emotional exhaustion and depersonalisation  
45  
46 dimensional factors of burnout; and are, therefore, typically viewed as its' core conceptual  
47  
48 components. However, the evidence surrounding professional accomplishment is  
49  
50 comparatively mixed. Consequently, personal accomplishment is generally viewed as a  
51  
52 separate, but related entity<sup>25</sup>.

1  
2  
3 Evidence derived from reviews and meta-analyses demonstrate a significant  
4 association between poor psychosocial working conditions and doctors' self-reported burnout  
5 symptoms<sup>17,18</sup>. Within the extant literature, burnout has predominantly been conceptualised  
6 and investigated as the outcome of a poor psychosocial work environment. However, there is  
7 increasing attention being paid to the potential role of burnout as an antecedent to a range of  
8 health-related, attitudinal and behavioural outcomes, including: depression and anxiety<sup>27</sup>,  
9 substance abuse<sup>28</sup>, work performance<sup>29</sup>, turnover intention<sup>30</sup> and patient care<sup>31</sup>. This is not  
10 surprising, as burnout depletes workers' energy and coping resources, which may results in  
11 increased physiological and psychological strain<sup>32</sup>. This may, in turn, trigger and exacerbate  
12 symptoms of psychological morbidity and work disengagement; and, consequently in the  
13 long term, interfere with performance<sup>33</sup>. The role of burnout has also been examined in  
14 relation to turnover intention, notably where healthcare workers' working conditions<sup>34</sup> and  
15 perceived nonbeneficial patient treatment<sup>19</sup> were predictors. Focusing specifically on doctors,  
16 to date limited research has sought to examine burnout as a possible mediating variable in  
17 relation to doctors' perceived working condition and their psychological health and  
18 experienced work-related attitudes. This study aims to address this gap in knowledge.  
19  
20  
21  
22  
23  
24  
25  
26  
27  
28  
29  
30  
31  
32  
33  
34  
35  
36  
37

### 38 **Study Aims**

39  
40  
41 The objectives of this study are twofold. Firstly, to examine the direct effect of  
42 psychosocial work characteristics (job autonomy and work-related pressure) in relation to  
43 self-reported psychological morbidity symptoms and early retirement intentions among a  
44 sample of hospital consultants in the NHS. Secondly, to investigate burnout as a mediating  
45 variable (i.e., indirect effect) of this postulated association. Figure 1 provides a visual  
46 representation of the study's postulated direct and indirect effects among independent and  
47 dependent variables.  
48  
49  
50  
51  
52  
53  
54  
55  
56  
57  
58  
59  
60



1  
2  
3 [Insert Figure 1 here ]  
4  
5  
6

## 7 **Method**

### 8 *Study design and sample*

9  
10  
11 A cross-sectional quantitative survey was carried out between November and  
12 December 2015. The Human Resources departments of all the Health Boards in Wales (n=7)  
13 and Scotland (n=10) were approached to participate in this study, along with 12 NHS Trusts  
14 from England. All agreed to forward an electronic survey, administered through Bristol  
15 Online Survey, to all their consultants. It is not possible to determine how many consultants  
16 actually received the survey. We used the response from a sample size of 500 consultants.  
17 This is based on a sample size calculation using survey sample method that considered a total  
18 consultant population of 10,000 across these Health Board and Trusts (assuming a proportion  
19 of 50%, a confidence interval of 95% and allowing 5% margin of error). The calculation  
20 yielded a required sample of 370 responses. This was increased to a larger sample of 500 to  
21 obtain better representation of the overall population. The study received ethical approval  
22 from Birkbeck University of London.  
23  
24  
25  
26  
27  
28  
29  
30  
31  
32  
33  
34  
35  
36  
37  
38  
39  
40

### 41 *Measures*

42  
43  
44 Surveed consultants provided information on socio-demographic details (age,  
45 gender, speciality, country, tenure as consultant), work-related pressure, job autonomy,  
46 burnout, early retirement intention, and anxiety and depressive symptoms.  
47  
48  
49  
50

### 51 *Psychosocial work characteristics*

52  
53  
54 Two specific psychosocial work characteristics were examined by the current study:  
55 job autonomy and work-related pressure. The decision to examine only two (out of myriad of  
56  
57  
58  
59  
60

possible psychosocial work characteristic) was based on what the contemporary literature repeatedly highlights as particularly salient work characteristics to NHS consultants<sup>35-37</sup>. These also serve as proxies for the two dimensions of the Job Demand-Control Model<sup>38</sup>. The English version of the Job Demands-Resources Questionnaire<sup>39</sup> was used to assess work-related pressure and job autonomy. Work-related pressure consisted of four items and job autonomy three items. All items were rated on a Likert scale: 1 (never) to 5 (very often).

### *Burnout*

The Maslach Burnout Inventory<sup>23</sup> was used to quantify the two examined dimensions of burnout: emotional exhaustion (9 items) and depersonalisation (5 items). Items were rated on a seven-point Likert scale (0, 'never' to 6, 'every day'). All subscale items were summed to create two composite scores. Higher scores are indicative of increased emotional exhaustion or depersonalisation. The summed scores on the two utilised composite measures were used to stratify the sample into 'high' and 'low' reference categories, with established norm scores of health professionals used to inform the categorization process<sup>40,41</sup>. A composite score of 27 or higher on the emotional exhausted scale and 13 or higher on the depersonalisation scale were used to categorise participants in the 'high' group. The 'low' group consisted of those with a score of 13 or lower for emotional exhaustion, and 5 or lower for depersonalisation.

### *Psychological Morbidity Symptoms*

Symptoms of trait depression and anxiety were measured by the State Trait Personality Inventory<sup>42</sup>. This 80-item inventory contains eight scales that measures state and trait-related depression, anxiety, curiosity and anger. Only the ten-item scales pertaining to trait-related depression and anxiety were included in this study. The scales are among the most widely used for anxiety and depression with strong psychometric properties<sup>42-44</sup>. The

1  
2  
3 frequency of each item was rated on a four-point Likert scale (1, 'almost never' and 4,  
4 'almost always'), with high scores representing more frequent experience of anxiety and  
5 depressive symptoms. Although neither measure has clinically diagnostic cut-off points,  
6 participants in this study with scores higher than the 75<sup>th</sup> percentile of UK working norm  
7 scores were classed as high scoring ( $\geq 18$  for anxiety;  $\geq 20$  for depression).  
8  
9  
10  
11  
12

#### 13 14 *Work-related Attitudinal Outcome: Early retirement intention*

15  
16  
17 Depending on the type of scheme, NHS consultants have the option of retiring at age  
18 60 (1995 section) or 65 years (2008 section). Therefore, early retirement intention was  
19 assessed through one Likert-based item commonly used in epidemiological surveys of the  
20 working population<sup>45</sup>: "do you think you will be doing this job when you are 60 years old".  
21 Anchored from 0 ("I would not even want to be") to 6 "yes".  
22  
23  
24  
25  
26  
27

#### 28 *Statistical analysis*

29  
30  
31 Descriptive statistics and study measures' internal consistency using Cronbach's  
32 alpha were analysed. Subsequently, bivariate two-tailed parametric correlations were  
33 calculated to examine the statistical association between study variables. Three multiple  
34 linear regression models were then carried out to examine the direct effects of the study's  
35 predictor variables (job autonomy, work-related pressure, emotional exhaustion and  
36 depersonalisation) on the three dependent measures: anxiety and depressive symptoms, and  
37 early retirement intention. Two additional multiple linear regressions tested the direct effects  
38 that job autonomy and work-related pressure had on emotional exhaustion and  
39 depersonalisation. Socio-demographic covariates (age, gender, speciality, country, tenure as  
40 consultant) were controlled for. Assumptions underlying multivariate linear regression were  
41 assessed by plotting residual errors and standardised residuals. Existence of multicollinearity  
42 was checked through variance inflation factors, and Durbin-Watson tests were conducted for  
43  
44  
45  
46  
47  
48  
49  
50  
51  
52  
53  
54  
55  
56  
57  
58  
59  
60

1  
2  
3 correlated residuals. All these diagnostics fell within the acceptable ranges for each multiple  
4  
5 linear regression model. SPSS (version 22) was used for data management and statistical  
6  
7 analysis. Missing data was examined; with, in general, low levels observed (i.e., 1.9% in  
8  
9 gender and 0.7% for consultant specialty). Such data was excluded from the analysis due  
10  
11 their non-significant size.  
12

13  
14 Hayes<sup>46</sup> PROCESS Model 4 macro was used to examine the indirect effects that  
15  
16 psychosocial work characteristics (i.e., job autonomy and work-related pressure) had on  
17  
18 consultants' psychological morbidity and turnover intention. Both emotional exhaustion and  
19  
20 depersonalisation were examined as mediators within these relationships. This approach tests  
21  
22 the indirect effect of both mediators, using a calculation of 1000 bias-corrected bootstrapped  
23  
24 confidence intervals (95%). Bootstrapping estimates model parameters and their standard  
25  
26 errors by the repeated sampling of the study sample. These do not assume that sampling  
27  
28 distributions are normal, which is especially applicable for mediation analyses<sup>47</sup>. Therefore,  
29  
30 bootstrapping generates more accurate confidence intervals than other more commonly used  
31  
32 mediation methods. In total six sets of analyses were carried out, with one set for each  
33  
34 relationship both predictors (work-related pressure, job autonomy) and the three outcome  
35  
36 measures (anxiety symptoms, depressive symptoms, early retirement intention). Consultants'  
37  
38 gender, age, experience, country and speciality were included as covariates. The paper is  
39  
40 reported in accordance with the STROBE statement<sup>48</sup>.  
41  
42  
43  
44

#### 45 *Patient and public involvement*

46  
47  
48 No patients or the public were involved in this study.  
49

## 50 **Results**

51  
52  
53 In total, 593 responses were completed. A full demographical breakdown is presented  
54  
55 in Table 1. The sample was relatively evenly split between England (32.5%), Wales (32%)  
56  
57  
58  
59

and Scotland (35.4%). The majority of respondents were male (63.1%), and aged between 41-50 years (45.5%) and 51-60 years (31%). In total, eight speciality groups were represented, with the majority of respondents identifying as physicians (28.8%), surgeons (18.2%), anaesthesiologists (14%) and others' (15.7%).

Table 1: Sample distribution and the proportion of the sample categorised as 'high' on the examined study variables

| Sample Characteristics     | N (% <sup>a</sup> ) | Burnout Dimensions   |        |                   |        | Psychological Morbidities |                          |
|----------------------------|---------------------|----------------------|--------|-------------------|--------|---------------------------|--------------------------|
|                            |                     | Emotional Exhaustion |        | Depersonalisation |        | High Anxiety symptoms     | High Depressive symptoms |
|                            |                     | High                 | Low    | High              | Low    |                           |                          |
| Total sample               | 593 (100 %)         | 38.70%               | 21.59% | 20.74%            | 58.85% | 43.10%                    | 36.10%                   |
| Countries:                 |                     |                      |        |                   |        |                           |                          |
| England                    | 193 (32.5%)         | 37.82%               | 8.8%   | 22.27%            | 56.48% | 52.13%                    | 43.09%                   |
| Wales                      | 190 (32.0%)         | 40.21%               | 27.51% | 20.11%            | 58.73% | 41.94%                    | 38.17%                   |
| Scotland                   | 210 (35.4%)         | 37.91%               | 18.48% | 20.38%            | 61.13% | 51.92%                    | 36.54%                   |
| Gender:                    |                     |                      |        |                   |        |                           |                          |
| Male                       | 374 (63.1 %)        | 37.43%               | 25.67% | 21.39%            | 55.88% | 47.33%                    | 41.98%                   |
| Female                     | 208 (35.1 %)        | 41.35%               | 13.94% | 20.19%            | 64.42% | 51.44%                    | 31.25%                   |
| Not specified              | 11 (1.9 %)          |                      |        |                   |        |                           |                          |
| Age:                       |                     |                      |        |                   |        |                           |                          |
| 30 - 40 years              | 119 (20.1 %)        | 41.18%               | 20.83% | 25.83%            | 57.50% | 50.83%                    | 37.50%                   |
| 41 - 50 years              | 267 (45.5 %)        | 35.58%               | 21.35% | 19.10%            | 58.43% | 47.49%                    | 40.15%                   |
| 51 - 60 years              | 184 (31.0 %)        | 42.93%               | 20.00% | 20.54%            | 58.38% | 52.22%                    | 37.78%                   |
| >60 years                  | 23 (3.9 %)          | 26.09%               | 41.67% | 12.50%            | 79.17% | 28.00%                    | 24.00%                   |
| Tenure:                    |                     |                      |        |                   |        |                           |                          |
| < 1 year                   | 25 (4.2%)           | 28.00%               | 24.00% | 24.00%            | 64.00% | 60.00%                    | 53.00%                   |
| 1 – 5 years                | 135 (22.9%)         | 37.04%               | 22.96% | 20.76%            | 62.22% | 56.29%                    | 50.37%                   |
| 6 – 10 years               | 154 (26.1%)         | 70.91%               | 20.13% | 18.18%            | 56.49% | 50.00%                    | 43.51%                   |
| 11 – 15 years              | 112 (19.0%)         | 37.50%               | 21.43% | 22.32%            | 54.46% | 50.89%                    | 40.18%                   |
| 16 – 20 years              | 86 (14.6%)          | 39.53%               | 15.12% | 24.41%            | 59.30% | 50.00%                    | 44.19%                   |
| > 21 years                 | 78 (13.2%)          | 41.02%               | 28.20% | 17.94%            | 61.54% | 39.74%                    | 33.33%                   |
| Not specified              | 3 (0.5%)            |                      |        |                   |        |                           |                          |
| Speciality:                |                     |                      |        |                   |        |                           |                          |
| Physician                  | 171 (28.8%)         | 33.33%               | 22.35% | 19.41%            | 61.18% | 47.88%                    | 35.15%                   |
| Surgeon                    | 108 (18.2%)         | 43.52%               | 19.44% | 27.48%            | 46.30% | 48.54%                    | 45.63%                   |
| Obstetrics/<br>Gynaecology | 24 (4.0%)           | 37.50%               | 12.50% | 12.50%            | 66.67% | 41.67%                    | 25.00%                   |
| Anaesthesia                | 83 (14.0%)          | 28.92%               | 28.91% | 25.30%            | 54.22% | 47.56%                    | 40.24%                   |
| Radiology                  | 41 (6.9%)           | 36.59%               | 24.39% | 19.51%            | 65.85% | 46.34%                    | 36.59%                   |

|                            |            |        |        |        |        |        |        |
|----------------------------|------------|--------|--------|--------|--------|--------|--------|
| Psychiatry                 | 47 (7.9%)  | 46.81% | 22.92% | 10.40% | 62.50% | 52.08% | 37.50% |
| Pathology/<br>Microbiology | 22 (3.7%)  | 59.09% | 18.18% | 9.09%  | 63.64% | 72.73% | 54.55% |
| Other                      | 93 (15.7%) | 44.09% | 17.20% | 22.58% | 65.59% | 47.31% | 34.41% |
| Not specified              | 4 (0.7%)   |        |        |        |        |        |        |

<sup>a</sup> After excluding missing values

Note: Risk for emotional exhaustion (high:  $\geq 27$ ; low  $\leq 13$ ) and depersonalisation (high:  $\geq 13$ ; low  $\leq 5$ ) was based on composite score on the Maslach Burnout Inventory; High depressive ( $\geq 20$ ) and anxiety ( $\geq 18$ ) was based on composite score on the State Trait Personality Inventory representing more frequent experience of symptoms.

Table 1 provides an overview of the proportion of the sample that were categorised as scoring 'high' on the examined study variables. These comparisons are not based on inferential statistics and are only for descriptive purposes. A sizable proportion of the survey sample reported a high level of depressive and anxiety symptoms. Four out of 10 consultants surveyed reported a high frequency of anxiety symptoms, and over a third of the sample were categorised as having a high degree of depressive symptoms. In relation to burnout, 38.7% of participants reported a high level of emotional exhaustion and 20.74% depersonalisation. The means, standard deviations and internal consistency for all study variables are presented in Table 2. All utilised composite measures demonstrated a satisfactory level of internal consistency. Bivariate two-tailed parametric correlations among the predictor and dependent measures are also provided in the same table.

Table 2: Descriptive statistics, correlations and reliability coefficients among study variables

| Variable                 | Internal consistency (Cronbach $\alpha$ ) | 1           | 2            | 3            | 4           | 5           | 6           | 7            | 8      | 9       |
|--------------------------|-------------------------------------------|-------------|--------------|--------------|-------------|-------------|-------------|--------------|--------|---------|
| 1. Job autonomy          | 0.88                                      | 6.15 (3.04) | -0.01        | -0.23**      | 0.15**      | 0.25**      | 0.33**      | 0.108        | -0.01  | -0.21** |
| 2. Work-related pressure | 0.90                                      |             | 11.71 (3.78) | 0.40**       | 0.15**      | 0.20**      | 0.18**      | -0.04        | -0.06  | 0.10*   |
| 3. Emotional exhaustion  | 0.92                                      |             |              | 23.38 (1.67) | 0.53**      | 0.57**      | 0.61**      | 0.02         | -0.01  | 0.21**  |
| 4. Depersonalisation     | 0.85                                      |             |              |              | 5.70 (5.74) | 0.40**      | 0.40**      | -0.03        | -0.08  | 0.14**  |
| 5. Anxiety symptoms      | 0.84                                      |             |              |              |             | 8.53 (4.84) | 0.81**      | -0.09*       | -0.04  | 0.16**  |
| 6. Depressive symptoms   | 0.91                                      |             |              |              |             |             | 8.92 (5.36) | -0.04        | 0.01   | 0.21**  |
| 7. Tenure                | -                                         |             |              |              |             |             |             | 11.27 (7.29) | 0.87** | -0.10*  |

|                     |   |                 |                |
|---------------------|---|-----------------|----------------|
| 8. Age              | - | 47.63<br>(7.47) | -0.11**        |
| 9. Early Retirement | - |                 | 1.58<br>(1.40) |

Note. Mean (SD) are reported diagonally; \*\* $p < .01$  level (2-tailed). \* $p < .05$  level (2-tailed).

### *Direct effects between psychosocial work characteristics and psychological morbidities*

Fewer relationships involving socio-demographic variables were found. High frequency of anxiety symptoms associated with older consultants ( $\beta = .17, p < .01$ ), consultants with less experience ( $\beta = -.19, p < .01$ ) and being male ( $\beta = -.12, p < .01$ ). Surveyed consultants from Wales had more frequent anxiety symptoms than compared to those sampled from Scotland ( $\beta = -.08, p < .05$ ). For depressive symptoms, being older ( $\beta = .18, p < .01$ ) and less experienced ( $\beta = -.18, p < .01$ ) was associated with more frequent depressive symptoms. In terms of speciality, Obstetrics & Gynaecology consultants reported less depressive symptoms ( $\beta = -.08, p < .05$ ) than Physicians. Surveyed consultants' intention to seek early retirement was not associated with any of the socio-demographic variables measured.

Table 3 presents the results from the five multiple linear regression analyses. Consultants' job autonomy negatively predicted the level of consultant's emotional exhaustion ( $\beta = -.26, p < .01$ ) and depersonalisation ( $\beta = -.17, p < .01$ ), as well as the frequency of their anxiety ( $\beta = -0.10, p < .01$ ) and depressive ( $\beta = -0.17, p < .01$ ) symptoms, and their early retirement intention ( $\beta = -0.19, p < .01$ ). Work-related pressure only predicted exhaustion ( $\beta = .38, p < .01$ ) and depersonalisation ( $\beta = .14, p < .01$ ), but not any of the other three dependent measures.

In terms of the burnout dimensions, emotional exhaustion positively predicted the frequency of consultants' anxiety ( $\beta = .47, p < .01$ ) and depressive ( $\beta = .54, p < .01$ ) symptoms, and stated intentions to retire early ( $\beta = .13, p < .05$ ). Depersonalisation only predicted anxiety ( $\beta = .16, p < .01$ ) and depressive ( $\beta = .12, p < .01$ ) symptoms. The association between depersonalisation and early retirement intention was not significant.

1  
2  
3  
4  
5  
6  
7  
8  
9  
10  
11  
12  
13  
14  
15  
16  
17  
18  
19  
20  
21  
22  
23  
24  
25  
26  
27  
28  
29  
30  
31  
32  
33  
34  
35  
36  
37  
38  
39  
40  
41  
42  
43  
44  
45  
46  
47  
48  
49  
50  
51  
52  
53  
54  
55  
56  
57  
58  
59  
60

For peer review only



Table 3: Multiple linear regression analyses – Dependant variables: anxiety symptoms, depressive symptoms and early retirement intention

| Predictors                 | Emotional Exhaustion<br>B/ $\beta$ [CI] | Depersonalisation<br>B/ $\beta$ [CI] | Anxiety Symptoms<br>B/ $\beta$ [CI] | Depressive Symptoms<br>B/ $\beta$ [CI] | Early Retirement Intention<br>B/ $\beta$ [CI] |
|----------------------------|-----------------------------------------|--------------------------------------|-------------------------------------|----------------------------------------|-----------------------------------------------|
| (Constant)                 | 19.74                                   |                                      | -0.021                              | -0.84                                  | 2.89                                          |
| Job autonomy               | -0.99** / .26<br>[-1.29, -0.69]         | -0.33** / -.17<br>[-0.48, -0.18]     | -0.15** / -0.1<br>[ 0.027, -0.04]   | -0.30** / -.17<br>[-0.42, -0.17]       | -0.09** / -.19<br>[-0.13, -0.05]              |
| Work-related pressure      | 1.19** / .38<br>[0.96, 1.45]            | 0.22** / .14<br>[0.09, 0.34]         | -0.03 / .02<br>[-.012, 0.07]        | -0.07 / -.07<br>[-0.17, 0.03]          | 0.01 / .03<br>[-.02, 0.05]                    |
| Emotional exhaustion       |                                         |                                      | 0.19** / .47<br>[0.16, 0.23]        | 0.25** / .54<br>[0.21, 0.29]           | 0.02* / .13<br>[0.01, 0.03]                   |
| Depersonalisation          |                                         |                                      | 0.14** / .16<br>[0.07, 0.20]        | 0.11** / .12<br>[0.04, 0.18]           | 0.01 / .02<br>[-0.02, 0.03]                   |
| Specialty                  |                                         |                                      |                                     |                                        |                                               |
| Pathology or Microbiology  | 6.58** / .10<br>[0.33, 12.06]           | -1.19 / -.04<br>[-3.60, 1.38]        | 0.97 / .04<br>[-0.84, 2.78]         | 0.71 / .02<br>[-1.22, 2.64]            | -0.17 / -.02<br>[-0.82, 0.48]                 |
| Surgery                    | 2.00 / .07<br>[-0.54, 4.52]             | 1.84* / .12<br>[0.45, 3.33]          | -0.75 / -.06<br>[-1.72, 0.22]       | -0.53 / -.04<br>[-1.56, 0.50]          | -0.09 / -.02<br>[0.43, 0.27]                  |
| Anaesthesia                | -.03 / -.01<br>[-2.95, 2.98]            | 0.81 / .05<br>[-0.60, 2.32]          | -0.28 / -.02<br>[-1.34, 0.78]       | 0.28 / .02<br>[-0.85, 1.41]            | -0.13 / -.03<br>[-0.51, 0.25]                 |
| Radiology                  | -2.72 / -.06<br>[-5.67, 0.66]           | -1.09 / -.05<br>[-2.88, 0.79]        | 0.60 / .03<br>[-0.74, 1.95]         | 0.46 / .02<br>[-0.97, 1.90]            | -0.08 / -.01<br>[-0.56, 0.41]                 |
| Psychiatry                 | 2.97 / .07<br>[-0.58, 0.66]             | 0.04 / .01<br>[-1.58, 1.72]          | 0.34 / .02<br>[-0.94, 1.63]         | -0.27 / -.01<br>[-1.64, 1.10]          | 0.27 / .05<br>[-0.19, 0.73]                   |
| Obstetrics/<br>Gynaecology | -1.68 / -.03<br>[-6.04, 3.04]           | -0.40 / -.01<br>[-2.83, 2.41]        | -1.64 / -.07<br>[-3.31, 0.03]       | -2.01* / -.08<br>[-3.79, -.22]         | 0.13 / .02<br>[0.48, 0.73]                    |
| Other                      | 1.87 / -.03<br>[-0.54, 4.80]            | 0.32 / .02<br>[-1.14, 1.73]          | -0.62 / -0.05<br>[-1.61, 0.37]      | -0.36 / -.02<br>[-1.42, 0.69]          | -0.16 / -.04<br>[-0.52, 0.20]                 |
| Physician (ref)            |                                         |                                      |                                     |                                        |                                               |
| Age                        | -2.11* / -.14<br>[-3.95, -0.27]         | -2.00** / -.28<br>[-2.97, -1.01]     | 0.17** / .27<br>[0.08, 0.26]        | 0.18** / .25<br>[0.08, 0.27]           | -0.03 / -.13<br>[-0.06, 0.01]                 |
| Gender (male)              | -.17 / -.07<br>[-3.70, 0.01]            | 0.16 / .01<br>[-0.84, 1.17]          | -1.17** / -.12<br>[-1.87, -0.47]    | -0.02 / .01<br>[-0.77, -0.73]          | -0.12 / -.04<br>[-0.37, 0.14]                 |
| Work experience (years)    | 0.30** / .19<br>[0.08, 0.50]            | 0.18** / .22<br>[0.07, 0.28]         | -0.19** / -.29<br>[0.29, -0.10]     | -0.18** / -.25<br>[-0.28, -0.08]       | 0.01 / 0.05<br>[-0.02, 0.04]                  |
| Country                    |                                         |                                      |                                     |                                        |                                               |
| Wales                      | -0.64<br>[-2.69, 1.52]                  | 0.13 / .23<br>[-1.18, 1.03]          | -0.82* / -.08<br>[-1.59, -0.04]     | -0.69 / -.06<br>[-1.52, 0.14]          | 0.04 / 0.01<br>[-0.24, 0.32]                  |
| England                    | -0.80<br>[-2.95, 1.30]                  | -0.12 / -.01<br>[-1.18, 1.03]        | -0.24 / -0.02<br>[-1.03, 0.56]      | -0.01 / .01<br>[-0.86, 0.84]           | -0.14 / -0.04<br>[-0.42, 0.15]                |
| Scotland (ref)             |                                         |                                      |                                     |                                        |                                               |
| F (df)                     | 12.82                                   | 3.64                                 | 21.94                               | 26.26                                  | 3.48                                          |
| df                         | 14, 569                                 | 14, 568                              | 16, 568                             | 16, 568                                | 16, 561                                       |

Note. \*  $p < .05$ , \*\*  $p < .01$ ; CI: 95% unstandardised confidence intervals.

*Indirect effects between psychosocial work characteristics and psychological morbidities*

Six mediation analyses were carried using Hayes<sup>46</sup> PROCESS macro to examine the mediating role of emotional exhaustion and depersonalisation. Table 4 presents that emotional exhaustion mediated the relationship between job autonomy and all three outcome measures: anxiety (-0.20, [95% CI -0.27, -0.12]) and depressive symptoms (-0.24, [95% CI -0.33, -0.15]) and early retirement intention (0.02, [95% CI 0.01, 0.04]). Depersonalisation was observed to partially mediate the relationship between job autonomy and anxiety (-0.05, [95% CI -0.09, -0.02]) and depressive symptoms (-0.04, [95% CI [-0.08, -0.01])). Depersonalisation, however, did not mediate at all the relationship between job autonomy and intentions for early retirement. Comparison of both mediators show that emotional exhaustion was the stronger mediator in relation to anxiety (-0.15, [95% CI -0.23, -0.08]) and depressive symptoms (-0.24 [95% CI -0.29, -0.11]), but not for early retirement intention (0.02, [95% CI -0.01, 0.04]).

Table 4: Estimated coefficients for mediation model with job autonomy as the predictor

| Mediator             | Outcome                    | Effect of predictor on mediator (a) | Effect of mediator on outcome (b) | Indirect effect of predictor on outcome (a*b) with 95% CI | Total effect of predictor on outcome (c) | Direct effect of predictor on outcome (c') |
|----------------------|----------------------------|-------------------------------------|-----------------------------------|-----------------------------------------------------------|------------------------------------------|--------------------------------------------|
| Emotional Exhaustion | Anxiety                    | -1.04**                             | 0.19**                            | -0.20<br>[-0.27, -0.12]                                   | -0.40**                                  | -0.16**                                    |
| Depersonalisation    | Anxiety                    | -0.34**                             | 0.14**                            | -0.05<br>[-0.09, -0.02]                                   |                                          |                                            |
| Emotional Exhaustion | Depressive symptoms        | -1.04**                             | 0.24**                            | -0.24<br>[-0.33, -0.15]                                   | -0.60**                                  | -0.31**                                    |
| Depersonalisation    | Depressive symptoms        | -0.34**                             | 0.11**                            | -0.04<br>[-0.08, -0.01]                                   |                                          |                                            |
| Emotional Exhaustion | Early retirement intention | -1.03**                             | -0.02**                           | 0.02<br>[0.01, 0.04]                                      | 0.11**                                   | 0.09**                                     |
| Depersonalisation    | Early retirement intention | -0.34**                             | -0.01                             | 0.01<br>[-0.01, 0.01]                                     |                                          |                                            |

*Note.* Gender, age, experience, country and speciality were included as covariates. \*  $p < .05$ , \*\*  $p < .01$ ; CI: 95% unstandardised confidence intervals.

The mediation analyses did not observe any direct effects between work-related pressure and any other three dependent measures. However, evidence of indirect effects among the study variables was observed via both core burnout dimensions (Table 5). Emotional exhaustion fully mediated the relationship between work-related pressure and the frequency of consultants' anxiety (0.25, [95% CI 0.18, 0.33]) and depressive symptoms (0.33, [95% CI 0.25, 0.42]), and stated intentions for early retirement (0.03, [95% CI -0.05, -0.01]). Depersonalisation fully mediated the association between work-related pressures and anxiety (0.03, [95% CI 0.01, 0.06]) and depressive (0.03, [95% CI 0.01, 0.05]) symptoms. No indirect effect between work-related pressure and early retirement relationship as mediated by depersonalisation were observed. In all three relationships, emotional exhaustion operated as the stronger mediator: anxiety symptoms (0.22, [95% CI 0.15, 0.30]), depressive symptoms (0.30 [95% CI 0.22, 0.39]) and early retirement intention (0.03, [95% CI -0.05, -0.01])

Table 5: Estimated coefficients for mediation model with work-related pressure as the predictor

| Mediator             | Outcome                    | Effect of predictor on mediator (a) | Effect of mediator on outcome (b) | Indirect effect of predictor on outcome (a*b) with 95% CI | Total effect of predictor on outcome (c) | Direct effect of predictor on outcome (c') |
|----------------------|----------------------------|-------------------------------------|-----------------------------------|-----------------------------------------------------------|------------------------------------------|--------------------------------------------|
| Emotional Exhaustion | Anxiety Symptoms           | 1.22**                              | 0.20**                            | 0.25<br>[0.18, 0.33]                                      | 0.24**                                   | -0.04                                      |
| Depersonalisation    | Anxiety Symptoms           | 0.23**                              | 0.14**                            | 0.03<br>[0.01, 0.06]                                      |                                          |                                            |
| Emotional Exhaustion | Depressive symptoms        | 1.22**                              | 0.27**                            | 0.33<br>[0.25, 0.42]                                      | 0.26**                                   | -0.09                                      |
| Depersonalisation    | Depressive symptoms        | 0.23**                              | 0.11**                            | 0.03<br>[0.01, 0.05]                                      |                                          |                                            |
| Emotional Exhaustion | Early retirement intention | 1.24**                              | -0.02**                           | -0.03<br>[-0.05, -0.01]                                   | -0.04*                                   | -0.01                                      |
| Depersonalisation    | Early retirement intention | 0.23**                              | -0.01                             | -0.01<br>[-0.01, 0.01]                                    |                                          |                                            |

Note. Gender, age, experience, country and speciality were included as covariates. \*  $p < .05$ , \*\*  $p < .01$ ; CI: 95% unstandardised confidence intervals.

## Discussion

A large, and growing, research literature has examined the impact of psychosocial work characteristics in relation to a myriad of work-related wellbeing measures<sup>5,7,8,12</sup>. This hazard-harm relationship is within the general working population strongly evidenced. However, it is important to understand the nature and driving mechanisms of this hazard-harm association within its given vocational and organisational contexts<sup>22</sup>. In consideration of this, the current study examined the nature and underpinning mechanisms of such postulated associations within a unique, and grossly under researched vocational group: NHS hospital-based consultants.

Approximately 40% of this sample were categorised as 'high' on emotional exhaustion, depressive symptoms and anxiety symptoms. These figures are higher than those reported by previous studies of NHS consultants<sup>49-52</sup>, and are similar to equivalent surveys of junior doctors<sup>18,53</sup>. It is, however, important to note that these comparison figures are drawn from studies that not only use different sampling approaches, but also used different measures for depressive and anxiety symptoms<sup>49-51</sup>, or did not publish the cut-off points used<sup>18,52,53</sup>. The latter is important considering that different studies using the same measures have utilized different cut-off points from each other<sup>40</sup>. These descriptive findings highlight the importance of considering the psychological health of doctors (at various stages of their career) as an imperative occupational health issue that necessitates targeted workplace intervention. This descriptive finding highlights, we believe, the importance of considering consultants as a particularly at-risk occupational group in regards to burnout and symptoms of psychological morbidity.

1  
2  
3 The negative impact of poor job autonomy and work-related pressures has been  
4 strongly evidenced in relation to psychological morbidity symptoms and work-related  
5 attitudinal outcomes within the general working population<sup>3,4,9,10</sup>. Like previous findings,  
6  
7 poor job autonomy was found to directly predict the increased frequency of depressive and  
8  
9 anxiety symptoms among surveyed consultants and increased intentions to seek early  
10  
11 retirement. Furthermore, this observed association was partially mediated by reported burnout  
12  
13 symptoms. According to the conservation of resources theory (COR)<sup>54</sup>, a depletion of energy  
14  
15 and coping resources due to burnout can result in a downward spiral that exacerbates resource  
16  
17 loss in other areas, including physiological and psychological resources that may trigger  
18  
19 depressive and anxiety symptoms<sup>33</sup>. Similarly, COR theory postulates that when faced with  
20  
21 exhaustion, energy depletion and depersonalisation, doctors experiencing burnout may view  
22  
23 leaving the profession as a mechanism in which to protect their remaining resources<sup>24</sup>.  
24  
25 Doctors leaving presents a significant loss of skill, knowledge and experience to the health  
26  
27 service<sup>35,36</sup>  
28  
29  
30  
31  
32  
33

34 To our knowledge this is the first study to examine burnout symptoms (i.e., emotional  
35  
36 exhaustions and depersonalisation) as a potential mediator between psychosocial work  
37  
38 characteristics and psychological morbidity symptoms and work-related attitudinal outcomes  
39  
40 as perceived by NHS consultants. However more broadly, these empirical findings contribute  
41  
42 to a small, albeit growing, research domain within the wider burnout literature. It provides  
43  
44 evidence of burnout's contributory role to work-related wellbeing as both an outcome, but  
45  
46 also an intervening variable. We would speculate that the nature of this association would  
47  
48 also, by extension, be predicative of work-related behaviours (e.g., leaving the profession)  
49  
50 and performance among medical professionals. However, this speculation remains untested  
51  
52 but remains an important avenue for future research.  
53  
54  
55  
56  
57  
58  
59  
60

1  
2  
3 The surveyed consultants' in this study reported symptoms of emotional exhaustion  
4 and depersonalisation were both observed to fully mediate the relationship between their  
5 perceived work-related pressures and reported psychological morbidities. This is consistent  
6 with previous studies, using nurses<sup>34</sup> or mixed occupational groups<sup>19</sup>, that have found burnout  
7 to mediate this relationship where turnover intention was the outcome measures. It is  
8 important to highlight that the findings derived from the mediation analysis are based on  
9 cross-sectional data. However, it does suggest that while excessive and chronic work-related  
10 pressures may not be directly associated with surveyed consultants' psychological health,  
11 instead it appears that the experience of burnout may play an important role facilitating its  
12 detrimental impact. However, it is plausible that the relationship between job autonomy,  
13 burnout, depressive and anxiety symptoms, and work-related stress may be reciprocal in  
14 nature. Therefore, such postulations of directionality and causality require further systematic  
15 longitudinal investigation.  
16  
17  
18  
19  
20  
21  
22  
23  
24  
25  
26  
27  
28  
29  
30

31 Despite the mediating role of the burnout dimensions, depersonalisation did not  
32 operate as a mediator where early retirement intention was an outcome. This is perhaps not  
33 surprising, as depersonalisation is defined as withdrawal from fully engaging with their  
34 current role<sup>22</sup>. Therefore, it may be that some consultants who cope at work through  
35 depersonalisation behavioural and cognitive actions may be less inclined to see early  
36 retirement as a method to leave their work environment, evidenced by an absence of this  
37 relationship in the analysis above. Nevertheless, the relationship that depersonalisation has  
38 with both depressive and anxiety symptoms suggests that this is not a healthy coping  
39 mechanism. It is also plausible that the resource and energy draining nature of emotional  
40 exhaustion means it is a stronger driver of NHS consultants looking to retire early.  
41  
42  
43  
44  
45  
46  
47  
48  
49  
50  
51  
52

### 53 *Practical implications*

54  
55  
56  
57  
58  
59  
60

1  
2  
3           Although reviews<sup>55,56</sup> have highlighted that individual-level cognitive, behavioural  
4  
5 and mindfulness based interventions can be effective in coping with burnout in the healthcare  
6  
7 sector, our findings highlight the value of workplace health interventions targeted at adapting  
8  
9 working conditions and proactively managing burnout among the NHS staff. One approach to  
10  
11 improve the psychosocial work environment is job crafting which has been found to improve  
12  
13 medical specialists' wellbeing and performance<sup>57</sup>. Socio-demographic variables had some  
14  
15 relationship with consultants' psychological morbidity symptoms, which warrants further  
16  
17 exploration in future research. Nevertheless, psychosocial work characteristics remain better  
18  
19 predictors of the study outcomes used. Consequently, comprehensive interventions that  
20  
21 simultaneously targeting organisational, material and work-time related conditions may be  
22  
23 more beneficial to worker health, than interventions only targeting the individual<sup>58</sup>.  
24  
25 Government and healthcare leaders need to consider how future organisational decisions in  
26  
27 the NHS may further impact on consultants' psychosocial work characteristics and, in turn,  
28  
29 their work-related wellbeing. Although the NHS is under increasing demands and financial  
30  
31 strain, greater dialogue between consultants, hospital managers and government officials, at  
32  
33 both the local and national level, will go some way in influencing how work-related pressure  
34  
35 and job autonomy are perceived and managed<sup>36,37</sup>.  
36  
37  
38

#### 39 40 *Strengths and limitations*

41  
42  
43           This study, to the best of our knowledge, is the first to demonstrate the mediating role  
44  
45 of burnout between psychosocial work characteristics of NHS consultants and their reported  
46  
47 depressive and anxiety symptoms and intentions to seek early retirement. Using a broad range  
48  
49 of standard psychometric measures with reported cut-off scores allows for comparison with  
50  
51 other studies of this (and other) professional groups. Also, Hayes' PROCESS Model 4 macro  
52  
53 with bootstrapping was used to test mediations, which generates more accurate confidence  
54  
55 intervals than other more commonly used mediation methods.  
56  
57  
58  
59  
60

1  
2  
3 In addition to the issue of cross-sectional data already discussed, a number of further  
4 limitations need to be acknowledged. First, because email invitations were sent via hospitals,  
5 we were not able to determine the response rate for this study. The sample size is smaller than  
6 that of past research into the prevalence of psychological morbidity amongst UK  
7 consultants<sup>1,2</sup>. This means that any generalizing this study's findings to the NHS consultant  
8 population, or even consultants more broadly, needs to acknowledge these sample and  
9 sampling limitations. The second limitation recognises that all study variables were drawn  
10 from self-report data of the individual consultant, making it vulnerable to common method  
11 bias; but, at the same time, this is an established method in quantitative research. Finally, it is  
12 important to reiterate that the measures used for depressive and anxiety symptoms do not  
13 reflect a clinical diagnosis of depression and anxiety. Instead, it represents the number of  
14 relevant symptoms and, therefore, these prevalence statistics should not be conflated with  
15 actual levels of depression or anxiety.  
16  
17  
18  
19  
20  
21  
22  
23  
24  
25  
26  
27  
28  
29  
30

### 31 *Conclusion*

32  
33  
34 The findings from the current study contribute to the small, but growing research area,  
35 namely: the examination of NHS's consultants' work-related wellbeing and the contributing  
36 role of their psychosocial working environment. Another important empirical contribution of  
37 this study is the observed evidence of experienced burnout symptoms mediating (either  
38 partially or fully) the observed relationship between job autonomy and work-related pressures  
39 in relation to surveyed consultants' psychological morbidity symptoms. This highlights the  
40 salient role of burnout as an intervening variable, and is especially concerning given the high  
41 prevalence of consultants scoring as 'high' on the burnout and psychological morbidity  
42 symptom measures. These findings emphasise the importance of preventing and mitigating  
43 burnout, and the cultivation of skill discretion and autonomy among consultants as an  
44 important organisationally-focused preventive strategy. This is important, not only for the  
45  
46  
47  
48  
49  
50  
51  
52  
53  
54  
55  
56  
57  
58  
59  
60



1  
2  
3  
4  
5  
6  
7  
8  
9  
10  
11  
12  
13  
14  
15  
16  
17  
18  
19  
20  
21  
22  
23  
24  
25  
26  
27  
28  
29  
30  
31  
32  
33  
34  
35  
36  
37  
38  
39  
40  
41  
42  
43  
44  
45  
46  
47  
48  
49  
50  
51  
52  
53  
54  
55  
56  
57  
58  
59  
60

NHS' ability to provide safe and high quality care<sup>31,59</sup>; but also to maintain and retain a healthy and productive workforce<sup>30</sup>.

For peer review only

## Other Information

### *Funding*

Research & Development department, Hywel Dda University Health Board.

### *Author Contributions*

AK and JH conceived the study concept and design. AK and KT drafted the first version of the manuscript. KT and JH provided critical revision of the manuscript as it went through the revision process. SI and KT did the data management and statistical analyses. All authors contributed to the content and critical revision of the report, and agreed to submit the report for publication.

### *Declaration of interests*

We have no competing interests to declare.

### *Acknowledgements*

We would like to thank all those who helped to collect the data. Professor Steve Bain, University of Swansea, was instrumental in making it easier to collect the data from Welsh Health Boards. Professor Graham Leese, University of Dundee, helped to create connections in Scotland to collect data from various hospitals. Consultant colleagues not only completed the questionnaire, they also provided positive feedback to ASAK. We are grateful to all human resource officers for helping ASAK to circulate the questionnaire web-link in respective hospitals.

## References

1. NHS Choices. About the National Health Service (NHS). The NHS in England. [www.nhs.uk/NHSEngland/thenhs/about/Pages/overview.aspx](http://www.nhs.uk/NHSEngland/thenhs/about/Pages/overview.aspx). Accessed January 8, 2015.
2. Chartered Institute for Personnel Development. *Absence Management: Annual Survey Report 2013*. London, UK: CIPD; 2013.
3. Bonde JPE. Psychosocial factors at work and risk of depression: A systematic review of the epidemiological evidence. *Occup Environ Med*. 2008;65(7):438-445. doi:10.1136/oem.2007.038430.
4. Stansfeld SA, Candy B. Psychosocial work environment and mental health- A meta-analytic review. *Scand J Work Environ Heal*. 2006;32(6):443-462. doi:10.5271/sjweh.1050.
5. Kouvonen A, Kivimäki M, Virtanen M, Pentti J, Vahtera J. Work stress, smoking status, and smoking intensity: An observational study of 46 190 employees. *J Epidemiol Community Health*. 2005;59(1):63-69. doi:10.1136/jech.2004.019752.
6. Kouvonen A, Kivimäki M, Elovainio M, et al. Low organisational justice and heavy drinking: a prospective cohort study. *Occup Environ Med*. 2008;65(1):44-50. doi:10.1136/oem.2007.032755.
7. Kivimäki M, Virtanen M, Elovainio M, Kouvonen A, Väänänen A, Vahtera J. Work stress in the etiology of coronary heart disease—A meta-analysis. *Scand J Work Environ Heal*. 2006;32(6):431-442. doi:10.5271/sjweh.1049.
8. Kuper H, Marmot MG. Job strain, job demands, decision latitude, and risk of coronary heart disease within the Whitehall II study. *J Epidemiol Community Health*. 2003;57(2):147-153. doi:10.1136/jech.57.2.147.
9. Faragher EB, Cass M, Cooper CL. The relationship between job satisfaction and health: A meta-analysis. *Occup Environ Med*. 2005;62(2):105-112. doi:10.1136/oem.2002.006734.
10. Wu T-Y, Fox DP, Stokes C, Adam C. Work-related stress and intention to quit in newly graduated nurses. *Nurse Educ Today*. 2012;32(6):669-674. doi:10.1016/j.nedt.2011.09.002.

- 1  
2  
3 11. Mathieu JE, Zajac DM. A review and meta-analysis of the antecedents, correlates, and  
4 consequences of organizational commitment. *Psychol Bull.* 1990;108(2):171-194.  
5 doi:10.1037/0033-2909.108.2.171.  
6  
7
- 8 12. Teoh KR-H, Hassard J, Cox T. Individual and organizational psychosocial predictors  
9 of hospital doctors' work-related wellbeing: A multilevel and moderation perspective.  
10 *Health Care Manage Rev.*  
11  
12
- 13 13. Adriaenssens J, De Gucht V, Maes S. Determinants and prevalence of burnout in  
14 emergency nurses: A systematic review of 25 years of research. *Int J Nurs Stud.*  
15 2015;52(2):649-661. doi:10.1016/j.ijnurstu.2014.11.004.  
16  
17
- 18 14. Cummings GG, MacGregor T, Davey M, et al. Leadership styles and outcome patterns  
19 for the nursing workforce and work environment: a systematic review. *Int J Nurs Stud.*  
20 2010;47(3):363-385. doi:10.1016/j.ijnurstu.2009.08.006.  
21  
22
- 23 15. McFadden P, Campbell A, Taylor B. Resilience and burnout in child protection social  
24 work: Individual and organisational themes from a systematic literature review. *Br J*  
25 *Soc Work.* 2015;45(5):1546-1563. doi:10.1093/bjsw/bct210.  
26  
27
- 28 16. Lloyd C, King R, Chenoweth L. Social work, stress and burnout: A review. *J Ment*  
29 *Heal.* 2002;11(3):255-265.  
30  
31
- 32 17. Lee RT, Seo B, Hladkyj S, Lovell BL, Schwartzmann L. Correlates of physician  
33 burnout across regions and specialties: A meta-analysis. *Hum Resour Health.*  
34 2013;11(1):48. doi:10.1186/1478-4491-11-48.  
35  
36
- 37 18. Prins JT, Gazendam-Donofrio SM, Tubben BJ, van der Heijden FMMA, van de Wiel  
38 HBM, Hoekstra-Weebers JEHM. Burnout in medical residents: A review. *Med Educ.*  
39 2007;41(8):788-800. doi:10.1111/j.1365-2923.2007.02797.x.  
40  
41
- 42 19. Schwarzkopf D, Rüdell H, Thomas-Rüdell DO, et al. Perceived nonbeneficial  
43 treatment of patients, burnout, and intention to leave the job among ICU nurses and  
44 junior and senior physicians. *Crit Care Med.* 2017;45(3):e265-e273.  
45  
46  
47  
48  
49  
50  
51  
52
- 53 20. Academy of Medical Royal Colleges. *The Benefits of Consultant Delivered Care.*  
54 London, UK; 2012.  
55
- 56 21. Peadon E, Caldwell PH, Oldmeadow W. "I enjoy teaching but...": Paediatricians'  
57  
58  
59  
60

- 1  
2  
3 attitudes to teaching medical students and junior doctors. *J Paediatr Child Health*.  
4 2010;46(11):647-652. doi:10.1111/j.1440-1754.2010.01823.x.  
5  
6  
7 22. Schaufeli WB. Burnout in health care. In: Carayon P, ed. *Handbook of Human Factors*  
8 *and Ergonomics in Health Care and Patient Safety*. New York, NY: CRC Press;  
9 2007:217-232.  
10  
11  
12 23. Maslach C, Jackson SE. *The Maslach Burnout Inventory Manual*. 2nd ed. Palo Alto,  
13 CA: Consulting Psychologists Press; 1986.  
14  
15  
16 24. Maslach C, Schaufeli WB, Leiter MP. Job burnout. *Annu Rev Psychol*.  
17 2001;52(1):397-422. doi:10.1146/annurev.psych.52.1.397.  
18  
19  
20 25. Schaufeli WB, Taris TW. The conceptualization and measurement of burnout:  
21 Common ground and worlds apart. *Work Stress*. 2005;19(3):256-262.  
22 doi:10.1080/02678370500385913.  
23  
24  
25 26. Demerouti E, Bakker AB, Nachreiner F, Schaufeli WB. The job demands-resources  
26 model of burnout. *J Appl Psychol*. 2001;86(3):499-512.  
27 doi:10.1108/02683940710733115.  
28  
29  
30  
31 27. Hakanen JJ, Schaufeli WB, Ahola K. The Job Demands-Resources model: A three-  
32 year cross-lagged study of burnout, depression, commitment, and work engagement.  
33 *Work Stress*. 2008;22(3):224-241. doi:10.1080/02678370802379432.  
34  
35  
36 28. Lheureux F, Truchot D, Borteyrou X. Suicidal tendency, physical health problems and  
37 addictive behaviours among general practitioners: Their relationship with burnout.  
38 *Work Stress*. 2016;30(2):173-192. doi:10.1080/02678373.2016.1171806.  
39  
40  
41  
42 29. Taris TW. Is there a relationship between burnout and objective performance? A  
43 critical review of 16 studies. *Work Stress*. 2006;20(4):316-334.  
44 doi:10.1080/02678370601065893.  
45  
46  
47 30. Tziner A, Rabenu E, Radomski R, Belkin A. Work stress and turnover intentions  
48 among hospital physicians: The mediating role of burnout and work satisfaction. *Rev*  
49 *Psicol del Trab y las Organ*. 2015;31(3):207-213. doi:10.1016/j.rpto.2015.05.001.  
50  
51  
52  
53 31. Dewa CS, Loong D, Bonato S, Trojanowski L. The relationship between physician  
54 burnout and quality of healthcare in terms of safety and acceptability: A systematic  
55 review. *BMJ Open*. 2017;7(6):e015141. doi:10.1136/bmjopen-2016-015141.  
56  
57  
58  
59

- 1  
2  
3 32. Hobfoll SE, Freedy J. Conservation of Resources: A general stress theory applied to  
4 burnout. In: Schaufeli WB, Maslach C, Marek T, eds. *Professional Burnout: Recent*  
5 *Developments in Theory and Research*. Philadelphia, PA: Taylor & Francis; 1993:115-  
6 133. doi:10.1680/udap.2010.163.  
7  
8  
9  
10 33. Toker S, Biron M. Job burnout and depression: Unraveling their temporal relationship  
11 and considering the role of physical activity. *J Appl Psychol*. 2012;97(3):699-710.  
12 doi:10.1037/a0026914.  
13  
14  
15 34. Leiter MP, Maslach C. Nurse turnover: The mediating role of burnout. *J Nurs Manag*.  
16 2009;17(3):331-339. doi:10.1111/j.1365-2834.2009.01004.x.  
17  
18  
19 35. Smith F, Lachish S, Goldacre MJ, Lambert TW. Factors influencing the decisions of  
20 senior UK doctors to retire or remain in medicine: National surveys of the UK-trained  
21 medical graduates of 1974 and 1977. *BMJ Open*. 2017;7(9):e017650.  
22 doi:10.1136/bmjopen-2017-017650.  
23  
24  
25  
26 36. Walker A, Awad Z, Tolley N, Narula A, Bradley P. Non-clinical demands are pushing  
27 experienced UK surgeons out of the NHS. *Int J Healthc Manag*. 2016;9(3):163-168.  
28 doi:10.1080/20479700.2015.1125081.  
29  
30  
31  
32 37. Martin G, Sieber S, Howieson B, Bushfield S. *The Changing Experience of Work of*  
33 *Consultants in NHS Scotland*.; 2015.  
34  
35  
36 38. Karasek RA. Job demands, job decision latitude, and mental strain: Implications for  
37 job redesign. *Adm Sci Q*. 1979;24(2):285. doi:10.2307/2392498.  
38  
39  
40 39. Bakker AB. *The Job Demands–Resources Questionnaire*. Rotterdam, the Netherlands;  
41 2014.  
42  
43  
44 40. Doulougeri K, Georganta K, Montgomery A. “Diagnosing” burnout among healthcare  
45 professionals: Can we find consensus? Lee A, ed. *Cogent Med*. 2016;3(1):1-10.  
46 doi:10.1080/2331205X.2016.1237605.  
47  
48  
49 41. Marcelino G, Cerveira JM, Carvalho I, et al. Burnout levels among Portuguese family  
50 doctors: A nationwide survey. *BMJ Open*. 2012;2(3):e001050. doi:10.1136/bmjopen-  
51 2012-001050.  
52  
53  
54 42. Spielberger CD. *State-Trait Personality Inventory (STPI) Research Manual*. Mind  
55 Garden Inc; 1995.  
56  
57  
58  
59  
60

- 1  
2  
3 43. Giesecke T, Williams DA, Harris RE, et al. Subgrouping of fibromyalgia patients on  
4 the basis of pressure-pain thresholds and psychological factors. *Arthritis Rheum*.  
5 2003;48(10):2916-2922. doi:10.1002/art.11272.  
6  
7  
8 44. Julian LJ. Measures of anxiety: State-Trait Anxiety Inventory (STAI), Beck Anxiety  
9 Inventory (BAI), and Hospital Anxiety and Depression Scale-Anxiety (HADS-A).  
10 *Arthritis Care Res (Hoboken)*. 2011;63(S11):S467-S472. doi:10.1002/acr.20561.  
11  
12  
13 45. Eurofound. *Sixth European Working Conditions Survey – Overview Report*.  
14 Luxembourg: Publications Office of the European Union; 2016.  
15 <http://www.eurofound.europa.eu/european-working-conditions-surveys-ewcs>.  
16  
17  
18 46. Hayes AF. *Introduction to Mediation, Moderation, and Conditional Process Analysis*.  
19 New York, NY: Guildford Press; 2013. doi:978-1-60918-230-4.  
20  
21  
22 47. Shrout PE, Bolger N. Mediation in experimental and nonexperimental studies: New  
23 procedures and recommendations. *Psychol Methods*. 2002;7(4):422-445.  
24 doi:10.1037//1082-989x.7.4.422.  
25  
26  
27 48. von Elm E, Altman DG, Egger M, Pocock SJ, Gotsche PC, Vandembroucke JP.  
28 Strengthening the reporting of observational studies in epidemiology (STROBE)  
29 statement: guidelines for reporting observational studies. *BMJ*. 2007;335(7624):806-  
30 808. doi:10.1136/bmj.39335.541782.AD.  
31  
32  
33 49. Coomber S. Stress in UK intensive care unit doctors. *Br J Anaesth*. 2002;89(6):873-  
34 881. doi:10.1093/bja/aef273.  
35  
36  
37 50. Burbeck R. Occupational stress in consultants in accident and emergency medicine: a  
38 national survey of levels of stress at work. *Emerg Med J*. 2002;19(3):234-238.  
39 doi:10.1136/emj.19.3.234.  
40  
41  
42 51. Taylor C, Graham J, Potts HWW, Richards MA, Ramirez AJ. Changes in mental  
43 health of UK hospital consultants since the mid-1990s. *Lancet*. 2005;366(9487):742-  
44 744. doi:10.1016/S0140-6736(05)67178-4.  
45  
46  
47 52. Ramirez AJ, Graham J, Richards MA, Cull A, Gregory WM. Mental health of hospital  
48 consultants: The effects of stress and satisfaction at work. *Lancet*.  
49 1996;347(9003):724-728. doi:10.1016/S0140-6736(96)90077-X.  
50  
51  
52 53. Toral-Villanueva R, Aguilar-Madrid G, Juárez-Pérez CA. Burnout and patient care in  
53  
54  
55  
56  
57  
58  
59  
60

- 1  
2  
3 junior doctors in Mexico City. *Occup Med (Chic Ill)*. 2009;59(1):8-13.  
4 doi:10.1093/occmed/kqn122.  
5  
6  
7 54. Hobfoll SE. Social and psychological resources and adaptation. *Rev Gen Psychol*.  
8 2002;6(4):307-324. doi:10.1037/1089-2680.6.4.307.  
9  
10  
11 55. Regehr C, Glancy D, Pitts A, LeBlanc VR. Interventions to reduce the consequences  
12 of stress in physicians: A review and meta-analysis. *J Nerv Ment Dis*.  
13 2014;202(5):353-359. doi:10.1097/NMD.000000000000130.  
14  
15  
16 56. West CP, Dyrbye LN, Erwin PJ, Shanafelt TD. Interventions to prevent and reduce  
17 physician burnout: A systematic review and meta-analysis. *Lancet*. 2016;6736(16).  
18 doi:10.1016/S0140-6736(16)31279-X.  
19  
20  
21 57. Gordon HJ, Demerouti E, Le Blanc PM, Bakker AB, Bipp T, Verhagen MAMT.  
22 Individual job redesign: Job crafting interventions in healthcare. *J Vocat Behav*. July  
23 2017. doi:10.1016/j.jvb.2017.07.002.  
24  
25  
26  
27 58. Montano D, Hoven H, Siegrist J. Effects of organisational-level interventions at work  
28 on employees' health: a systematic review. *BMC Public Health*. 2014;14(1):135.  
29 doi:10.1186/1471-2458-14-135.  
30  
31  
32  
33 59. Hall LH, Johnson J, Watt I, Tsipa A, O'Connor DB. Healthcare staff wellbeing,  
34 burnout, and patient safety: A systematic review. *PLoS One*. 2016;11(7):1-12.  
35 doi:10.1371/journal.pone.0159015.  
36  
37  
38  
39  
40  
41  
42  
43  
44  
45  
46  
47  
48  
49  
50  
51  
52  
53  
54  
55  
56  
57  
58  
59  
60



1  
2  
3  
4  
5  
6  
7  
8  
9  
10  
11  
12  
13  
14  
15  
16  
17  
18  
19  
20  
21  
22  
23  
24  
25  
26  
27  
28  
29  
30  
31  
32  
33  
34  
35  
36  
37  
38  
39  
40  
41  
42  
43  
44  
45  
46  
47  
48  
49  
50  
51  
52  
53  
54  
55  
56  
57  
58  
59  
60

**Figure 1.** Postulated direct and indirect effects of job autonomy and work-related pressures

For peer review only

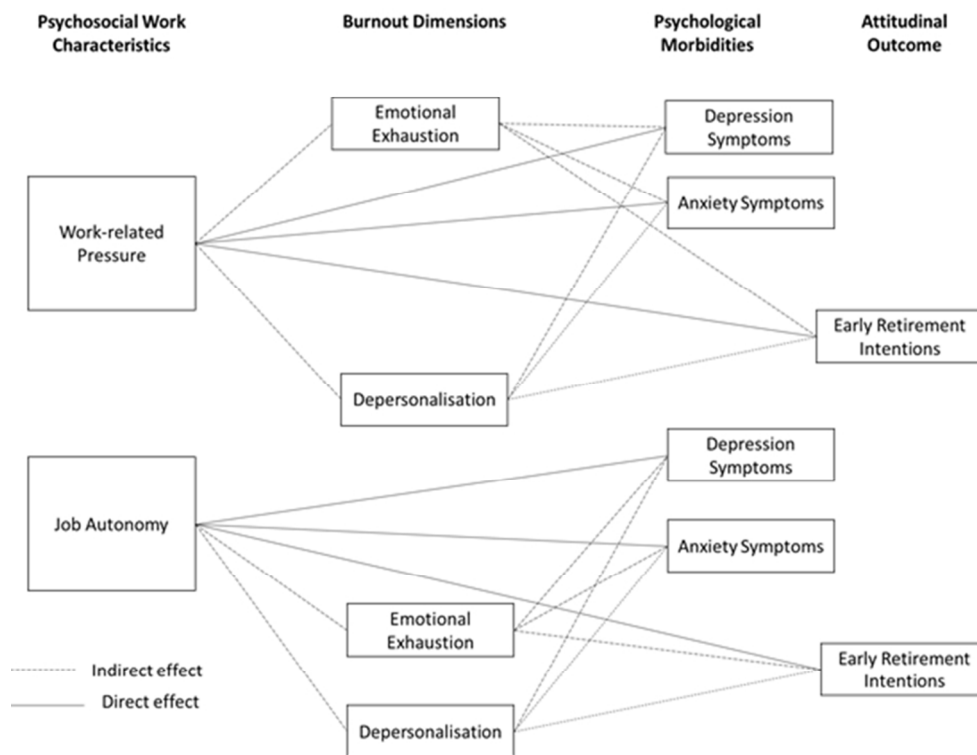

Figure 1. Postulated direct and indirect effects of job autonomy and work-related pressures

83x63mm (300 x 300 DPI)

**STROBE Checklist for Psychosocial Work Characteristics, Burnout, Psychological Morbidity Symptoms and Early Retirement Intentions: A Cross-sectional Study of NHS Consultants in the United Kingdom.**

STROBE Statement—Checklist of items that should be included in reports of *cross-sectional studies*

|                           | Item No | Recommendation                                                                                                                                                                       | Location                                              |
|---------------------------|---------|--------------------------------------------------------------------------------------------------------------------------------------------------------------------------------------|-------------------------------------------------------|
| <b>Title and abstract</b> | 1       | (a) Indicate the study’s design with a commonly used term in the title or the abstract                                                                                               | In title the term “cross-sectional” is included       |
|                           |         | (b) Provide in the abstract an informative and balanced summary of what was done and what was found                                                                                  | Abstract based on the journal’s structure is included |
| <b>Introduction</b>       |         |                                                                                                                                                                                      |                                                       |
| Background/rationale      | 2       | Explain the scientific background and rationale for the investigation being reported                                                                                                 | Pg. 4 of the manuscript, paragraph 1.                 |
| Objectives                | 3       | State specific objectives, including any prespecified hypotheses                                                                                                                     | Pg. 6 under “Study Aims”                              |
| <b>Methods</b>            |         |                                                                                                                                                                                      |                                                       |
| Study design              | 4       | Present key elements of study design early in the paper                                                                                                                              | Pg. 7 under “study design and sample”                 |
| Setting                   | 5       | Describe the setting, locations, and relevant dates, including periods of recruitment, exposure, follow-up, and data collection                                                      | Pg. 7 under “study design and sample”                 |
| Participants              | 6       | (a) Give the eligibility criteria, and the sources and methods of selection of participants                                                                                          | Pg. 7 under “study design and sample”                 |
| Variables                 | 7       | Clearly define all outcomes, exposures, predictors, potential confounders, and effect modifiers. Give diagnostic criteria, if applicable                                             | Variables are introduced in the Introduction          |
| Data sources/ measurement | 8*      | For each variable of interest, give sources of data and details of methods of assessment (measurement). Describe comparability of assessment methods if there is more than one group | Pg. 7 under “Measures”                                |
| Bias                      | 9       | Describe any efforts to address potential sources of bias                                                                                                                            |                                                       |
| Study size                | 10      | Explain how the study size was arrived at                                                                                                                                            | Pg. 7 under “study design and sample”                 |
| Quantitative variables    | 11      | Explain how quantitative variables were handled in the analyses. If applicable, describe which groupings were chosen and why                                                         | Pg 9 under “Statistical analysis”                     |
| Statistical methods       | 12      | (a) Describe all statistical methods, including those used to control for confounding                                                                                                | Pg 9 under “Statistical analysis”                     |
|                           |         | (b) Describe any methods used to examine subgroups and interactions                                                                                                                  | Not applicable                                        |

|                          |     |                                                                                                                                                                                                              |                                           |
|--------------------------|-----|--------------------------------------------------------------------------------------------------------------------------------------------------------------------------------------------------------------|-------------------------------------------|
|                          |     | (c) Explain how missing data were addressed                                                                                                                                                                  | Pg. 7 under “study design and sample”     |
|                          |     | (d) If applicable, describe analytical methods taking account of sampling strategy                                                                                                                           | Pg 9 under “Statistical analysis”         |
|                          |     | (e) Describe any sensitivity analyses                                                                                                                                                                        | Not applicable                            |
| <b>Results</b>           |     |                                                                                                                                                                                                              |                                           |
| Participants             | 13* | (a) Report numbers of individuals at each stage of study—eg numbers potentially eligible, examined for eligibility, confirmed eligible, included in the study, completing follow-up, and analysed            | Pg. 7 under “study design and sample”     |
|                          |     | (b) Give reasons for non-participation at each stage                                                                                                                                                         | Not applicable                            |
|                          |     | (c) Consider use of a flow diagram                                                                                                                                                                           | Not applicable                            |
| Descriptive data         | 14* | (a) Give characteristics of study participants (eg demographic, clinical, social) and information on exposures and potential confounders                                                                     | Table 1                                   |
|                          |     | (b) Indicate number of participants with missing data for each variable of interest                                                                                                                          | Table 1                                   |
| Outcome data             | 15* | Report numbers of outcome events or summary measures                                                                                                                                                         | Table 2                                   |
| Main results             | 16  | (a) Give unadjusted estimates and, if applicable, confounder-adjusted estimates and their precision (eg, 95% confidence interval). Make clear which confounders were adjusted for and why they were included | Tables 2-5                                |
|                          |     | (b) Report category boundaries when continuous variables were categorized                                                                                                                                    | Not applicable                            |
|                          |     | (c) If relevant, consider translating estimates of relative risk into absolute risk for a meaningful time period                                                                                             | Not applicable                            |
| Other analyses           | 17  | Report other analyses done—eg analyses of subgroups and interactions, and sensitivity analyses                                                                                                               | Tables 2-5                                |
| <b>Discussion</b>        |     |                                                                                                                                                                                                              |                                           |
| Key results              | 18  | Summarise key results with reference to study objectives                                                                                                                                                     | Pg. 17, first paragraph of discussion     |
| Limitations              | 19  | Discuss limitations of the study, taking into account sources of potential bias or imprecision. Discuss both direction and magnitude of any potential bias                                                   | Pg. 20, strengths and limitations section |
| Interpretation           | 20  | Give a cautious overall interpretation of results considering objectives, limitations, multiplicity of analyses, results from similar studies, and other relevant evidence                                   | Discussion section                        |
| Generalisability         | 21  | Discuss the generalisability (external validity) of the study results                                                                                                                                        | Discussion section                        |
| <b>Other information</b> |     |                                                                                                                                                                                                              |                                           |
| Funding                  | 22  | Give the source of funding and the role of the funders for the present study and, if applicable, for                                                                                                         | Title Page                                |

1  
2  
3  
4  
5  
6  
7  
8  
9  
10  
11  
12  
13  
14  
15  
16  
17  
18  
19  
20  
21  
22  
23  
24  
25  
26  
27  
28  
29  
30  
31  
32  
33  
34  
35  
36  
37  
38  
39  
40  
41  
42  
43  
44  
45  
46  
47

---

the original study on which the present article is based

---

\*Give information separately for exposed and unexposed groups.

**Note:** An Explanation and Elaboration article discusses each checklist item and gives methodological background and published examples of transparent reporting. The STROBE checklist is best used in conjunction with this article (freely available on the Web sites of PLoS Medicine at <http://www.plosmedicine.org/>, Annals of Internal Medicine at <http://www.annals.org/>, and Epidemiology at <http://www.epidem.com/>). Information on the STROBE Initiative is available at [www.strobe-statement.org](http://www.strobe-statement.org).

For peer review only
